# Supplementary material
Source: PubMed Central journal article supplement (PMC129429)
Supplement: pnas_192360899_1.pdf [file pnas_192360899_1.pdf]

**Table 4. Direction of effects of QTL for crosses between wild and domesticated populations**

| Kingdom | Species                                   | Cross | Mating system   | Trait                   | Dom. (D) | No. antag. QTLs | Total QTLs | Ratio | P      | Ref. |
|---------|-------------------------------------------|-------|-----------------|-------------------------|----------|-----------------|------------|-------|--------|------|
| Animal  | <i>Apis mellifera</i>                     | Intra | Outcross        | Alarm pheromones        |          | 3               | 9          | 0.33  | 0.5078 | 1    |
| Animal  | <i>Apis mellifera</i>                     | Intra | Outcross        | Foraging behavior       | D        | 1               | 3          | 0.33  |        | 2    |
| Animal  | <i>Apis mellifera</i>                     | Intra | Outcross        | Tendency to sting       | D        | 1               | 5          | 0.20  |        | 3    |
| Animal  | <i>Apis mellifera</i>                     | Intra | Outcross        | Drone wing length       |          | 0               | 5          | 0.00  |        | 3    |
| Animal  | <i>Apis mellifera</i>                     | Intra | Outcross        | Worker wing length      |          | 0               | 4          | 0.00  |        | 3    |
| Animal  | <i>Sus scrofa</i>                         | Intra | Outcross        | Birth weight            | D        | 1               | 3          | 0.33  |        | 4    |
| Animal  | <i>Sus scrofa</i>                         | Intra | Outcross        | Growth rate to 30 kg    | D        | 0               | 2          | 0.00  |        | 4    |
| Animal  | <i>Sus scrofa</i>                         | Intra | Outcross        | Growth rate to 70 kg    | D        | 1               | 3          | 0.33  |        | 4    |
| Animal  | <i>Sus scrofa</i>                         | Intra | Outcross        | Growth rate 30-70 kg    | D        | 1               | 3          | 0.33  |        | 4    |
| Animal  | <i>Sus scrofa</i>                         | Intra | Outcross        | Length small intestine  |          | 2               | 9          | 0.22  | 0.1797 | 4    |
| Animal  | <i>Sus scrofa</i>                         | Intra | Outcross        | Abdominal fat           | D        | 2               | 7          | 0.29  | 0.4531 | 4    |
| Animal  | <i>Sus scrofa</i>                         | Intra | Outcross        | Average depth back fat  | D        | 1               | 7          | 0.14  | 0.1250 | 4    |
| Animal  | <i>Sus scrofa</i>                         | Intra | Outcross        | Femur measurements PC1  |          | 0               | 2          | 0.00  |        | 5    |
| Animal  | <i>Sus scrofa</i>                         | Intra | Outcross        | Femur measurements PC2  |          | 0               | 2          | 0.00  |        | 5    |
| Animal  | <i>Sus scrofa</i>                         | Intra | Outcross        | Osteochondrosis         |          | 0               | 2          | 0.00  |        | 5    |
| Animal  | <i>Sus scrofa</i>                         | Intra | Outcross        | Osteochondrosis         |          | 1               | 2          | 0.50  |        | 5    |
| Plant   | <i>Glycine max x G. soja</i>              | Inter | Self            | Pod dehiscence          | D        | 2               | 5          | 0.40  |        | 6    |
| Plant   | <i>Gossypium hirsutum x G. barbadense</i> | Inter | Outcross        | Leaf morphology - a2    |          | 3               | 7          | 0.43  | 1.0000 | 7    |
| Plant   | <i>Gossypium hirsutum x G. barbadense</i> | Inter | Outcross        | Leaf morphology - a3    |          | 2               | 5          | 0.40  |        | 7    |
| Plant   | <i>Gossypium hirsutum x G. barbadense</i> | Inter | Outcross        | Leaf morphology - l1    |          | 3               | 6          | 0.50  | 1.0000 | 7    |
| Plant   | <i>Gossypium hirsutum x G. barbadense</i> | Inter | Outcross        | Leaf morphology - l2    |          | 2               | 7          | 0.29  | 0.4531 | 7    |
| Plant   | <i>Gossypium hirsutum x G. barbadense</i> | Inter | Outcross        | Leaf morphology - l3    |          | 2               | 6          | 0.33  | 0.5238 | 7    |
| Plant   | <i>Gossypium hirsutum x G. barbadense</i> | Inter | Outcross        | Leaf morphology - s11   |          | 0               | 1          | 0.00  |        | 7    |
| Plant   | <i>Gossypium hirsutum x G. barbadense</i> | Inter | Outcross        | Leaf morphology - w1    |          | 2               | 4          | 0.50  |        | 7    |
| Plant   | <i>Gossypium hirsutum x G. barbadense</i> | Inter | Outcross        | Leaf morphology - w2    |          | 4               | 8          | 0.50  | 1.0000 | 7    |
| Plant   | <i>Gossypium hirsutum x G. barbadense</i> | Inter | Outcross        | Leaf morphology - w3    |          | 2               | 7          | 0.29  | 0.4531 | 7    |
| Plant   | <i>Gossypium hirsutum x G. barbadense</i> | Inter | Outcross        | Leaf morphology - hair  |          | 0               | 1          | 0.00  |        | 7    |
| Plant   | <i>Helianthus annuus</i>                  | Intra | Outcross x self | Days to flower          |          | 5               | 10         | 0.50  | 1.0000 | 8    |
| Plant   | <i>Helianthus annuus</i>                  | Intra | Outcross x self | Stem diameter           |          | 2               | 6          | 0.33  | 0.5238 | 8    |
| Plant   | <i>Helianthus annuus</i>                  | Intra | Outcross x self | Height                  |          | 2               | 6          | 0.33  | 0.5238 | 8    |
| Plant   | <i>Helianthus annuus</i>                  | Intra | Outcross x self | No. of main stem leaves |          | 2               | 5          | 0.40  |        | 8    |
| Plant   | <i>Helianthus annuus</i>                  | Intra | Outcross x self | Leaf shape              |          | 0               | 2          | 0.00  |        | 8    |
| Plant   | <i>Helianthus annuus</i>                  | Intra | Outcross x self | Leaf size               |          | 2               | 4          | 0.50  |        | 8    |
| Plant   | <i>Helianthus annuus</i>                  | Intra | Outcross x self | Peduncle length         |          | 0               | 3          | 0.00  |        | 8    |
| Plant   | <i>Helianthus annuus</i>                  | Intra | Outcross x self | No. of branches         |          | 1               | 3          | 0.33  |        | 8    |
| Plant   | <i>Helianthus annuus</i>                  | Intra | Outcross x self | No. of heads            |          | 2               | 5          | 0.40  |        | 8    |

| Kingdom | Species                                        | Cross | Mating system   | Trait                                 | Dom.<br>(D) | No.<br>antag.<br>QTLs | Total<br>QTLs | Ratio | P      | Ref. |
|---------|------------------------------------------------|-------|-----------------|---------------------------------------|-------------|-----------------------|---------------|-------|--------|------|
| Plant   | <i>Helianthus annuus</i>                       | Intra | Outcross x self | No. of heads/branch                   |             | 1                     | 5             | 0.20  |        | 8    |
| Plant   | <i>Helianthus annuus</i>                       | Intra | Outcross x self | Disk diameter                         |             | 1                     | 3             | 0.33  |        | 8    |
| Plant   | <i>Helianthus annuus</i>                       | Intra | Outcross x self | No. of ray flowers                    |             | 2                     | 5             | 0.40  |        | 8    |
| Plant   | <i>Helianthus annuus</i>                       | Intra | Outcross x self | Ray size                              |             | 1                     | 3             | 0.33  |        | 8    |
| Plant   | <i>Helianthus annuus</i>                       | Intra | Outcross x self | No. of selfed seeds                   |             | 0                     | 2             | 0.00  |        | 8    |
| Plant   | <i>Helianthus annuus</i>                       | Intra | Outcross x self | Achene weight                         | D           | 1                     | 7             | 0.14  | 0.1250 | 8    |
| Plant   | <i>Helianthus annuus</i>                       | Intra | Outcross x self | Achene width                          | D           | 1                     | 5             | 0.20  |        | 8    |
| Plant   | <i>Helianthus annuus</i>                       | Intra | Outcross x self | Achene length                         | D           | 0                     | 2             | 0.00  |        | 8    |
| Plant   | <i>Helianthus annuus</i>                       | Intra | Outcross x self | Shattering                            | D           | 0                     | 2             | 0.00  |        | 8    |
| Plant   | <i>Helianthus annuus x H. debilis</i>          | Inter | Outcross x self | Days to first flower                  |             | 0                     | 3             | 0.00  |        | 9    |
| Plant   | <i>Helianthus annuus x H. debilis</i>          | Inter | Outcross x self | Tooth height                          |             | 0                     | 3             | 0.00  |        | 9    |
| Plant   | <i>Helianthus annuus x H. debilis</i>          | Inter | Outcross x self | Head number                           |             | 0                     | 2             | 0.00  |        | 9    |
| Plant   | <i>Helianthus annuus x H. debilis</i>          | Inter | Outcross x self | Ray number                            |             | 1                     | 4             | 0.25  |        | 9    |
| Plant   | <i>Helianthus annuus x H. debilis</i>          | Inter | Outcross x self | Ligule length                         |             | 1                     | 3             | 0.33  |        | 9    |
| Plant   | <i>Helianthus annuus x H. debilis</i>          | Inter | Outcross x self | Ligule width                          |             | 1                     | 3             | 0.33  |        | 9    |
| Plant   | <i>Helianthus annuus x H. debilis</i>          | Inter | Outcross x self | Ligule shape                          |             | 1                     | 5             | 0.20  |        | 9    |
| Plant   | <i>Helianthus annuus x H. debilis</i>          | Inter | Outcross x self | Disk diameter                         |             | 0                     | 3             | 0.00  |        | 9    |
| Plant   | <i>Helianthus annuus x H. debilis</i>          | Inter | Outcross x self | Phyllary length                       |             | 1                     | 3             | 0.33  |        | 9    |
| Plant   | <i>Helianthus annuus x H. debilis</i>          | Inter | Outcross x self | Phyllary width                        |             | 0                     | 5             | 0.00  |        | 9    |
| Plant   | <i>Helianthus annuus x H. debilis</i>          | Inter | Outcross x self | Phyllary shape                        |             | 1                     | 4             | 0.25  |        | 9    |
| Plant   | <i>Helianthus annuus x H. debilis</i>          | Inter | Outcross x self | Phyllary pubescence                   |             | 0                     | 4             | 0.00  |        | 9    |
| Plant   | <i>Helianthus annuus x H. debilis</i>          | Inter | Outcross x self | Achene length                         | D           | 0                     | 4             | 0.00  |        | 9    |
| Plant   | <i>Helianthus annuus x H. debilis</i>          | Inter | Outcross x self | Achene width                          | D           | 1                     | 4             | 0.25  |        | 9    |
| Plant   | <i>Helianthus annuus x H. debilis</i>          | Inter | Outcross x self | Achene shape                          |             | 3                     | 6             | 0.50  | 1.0000 | 9    |
| Plant   | <i>Helianthus annuus x H. debilis</i>          | Inter | Outcross x self | Pollen viability                      |             | 0                     | 2             | 0.00  |        | 9    |
| Plant   | <i>Lactuca sativa x L. serriola</i>            | Inter | Outcross x self | Primary root traits - greenhouse      |             | 0                     | 2             | 0.00  |        | 10   |
| Plant   | <i>Lactuca sativa x L. serriola</i>            | Inter | Outcross x self | Secondary root traits - greenhouse    |             | 0                     | 5             | 0.00  |        | 10   |
| Plant   | <i>Lactuca sativa x L. serriola</i>            | Inter | Outcross x self | Primary root traits - field           |             | 0                     | 2             | 0.00  |        | 10   |
| Plant   | <i>Lactuca sativa x L. serriola</i>            | Inter | Outcross x self | Secondary root traits - field         |             | 0                     | 3             | 0.00  |        | 10   |
| Plant   | <i>Lactuca sativa x L. serriola</i>            | Inter | Outcross x self | Shoot biomass                         | D           | 0                     | 1             | 0.00  |        | 10   |
| Plant   | <i>Lycopersicon esculentum x L. cheesmanii</i> | Inter | Outcross x self | Fruit weight                          | D           | 0                     | 6             | 0.00  | 0.0238 | 11   |
| Plant   | <i>Lycopersicon esculentum x L. cheesmanii</i> | Inter | Outcross x self | Soluble solids                        | D           | 0                     | 13            | 0.00  | 0.0002 | 11   |
| Plant   | <i>Lycopersicon esculentum x L. cheesmanii</i> | Inter | Outcross x self | Seed weight                           |             | 1                     | 14            | 0.07  | 0.0015 | 11   |
| Plant   | <i>Lycopersicon esculentum x L. cheesmanii</i> | Inter | Outcross x self | Plant height                          |             | 1                     | 7             | 0.14  | 0.1250 | 12   |
| Plant   | <i>Lycopersicon esculentum x L. cheesmanii</i> | Inter | Outcross x self | No. of nodes                          |             | 0                     | 6             | 0.00  | 0.0238 | 12   |
| Plant   | <i>Lycopersicon esculentum x L. cheesmanii</i> | Inter | Outcross x self | Flower node number                    |             | 2                     | 6             | 0.33  | 0.5238 | 12   |
| Plant   | <i>Lycopersicon esculentum x L. cheesmanii</i> | Inter | Outcross x self | No. of branches                       |             | 2                     | 7             | 0.29  | 0.4531 | 12   |
| Plant   | <i>Lycopersicon esculentum x L. cheesmanii</i> | Inter | Outcross x self | Leaf length                           |             | 2                     | 6             | 0.33  | 0.5238 | 12   |
| Plant   | <i>Lycopersicon esculentum x L. cheesmanii</i> | Inter | Outcross x self | Plant fresh mass                      |             | 0                     | 7             | 0.00  | 0.0156 | 12   |
| Plant   | <i>Lycopersicon esculentum x L. cheesmanii</i> | Inter | Outcross x self | Fruit mass - F <sub>2</sub>           | D           | 0                     | 7             | 0.00  | 0.0156 | 13   |
| Plant   | <i>Lycopersicon esculentum x L. cheesmanii</i> | Inter | Outcross x self | Fruit mass - CA                       | D           | 0                     | 9             | 0.00  | 0.0039 | 13   |
| Plant   | <i>Lycopersicon esculentum x L. cheesmanii</i> | Inter | Outcross x self | Fruit diameter - IS                   | D           | 1                     | 4             | 0.25  |        | 13   |
| Plant   | <i>Lycopersicon esculentum x L. cheesmanii</i> | Inter | Outcross x self | Soluble solids conc. - F <sub>2</sub> | D           | 0                     | 4             | 0.00  |        | 13   |

| Kingdom | Species                                                 | Cross | Mating system   | Trait                             | Dom. (D) | No. antag. QTLs | Total QTLs | Ratio | P      | Ref. |
|---------|---------------------------------------------------------|-------|-----------------|-----------------------------------|----------|-----------------|------------|-------|--------|------|
| Plant   | <i>Lycopersicon esculentum</i> x <i>L. cheesmanii</i>   | Inter | Outcross x self | Soluble solids conc. - CA         | D        | 0               | 3          | 0.00  |        | 13   |
| Plant   | <i>Lycopersicon esculentum</i> x <i>L. cheesmanii</i>   | Inter | Outcross x self | Soluble solids conc. - IS         | D        | 1               | 5          | 0.20  |        | 13   |
| Plant   | <i>Lycopersicon esculentum</i> x <i>L. cheesmanii</i>   | Inter | Outcross x self | Fruit pH - F <sub>2</sub>         |          | 2               | 5          | 0.40  |        | 13   |
| Plant   | <i>Lycopersicon esculentum</i> x <i>L. cheesmanii</i>   | Inter | Outcross x self | Fruit pH - CA                     |          | 3               | 8          | 0.38  | 0.5706 | 13   |
| Plant   | <i>Lycopersicon esculentum</i> x <i>L. cheesmanii</i>   | Inter | Outcross x self | Fruit pH - IS                     |          | 1               | 2          | 0.50  |        | 13   |
| Plant   | <i>Lycopersicon esculentum</i> x <i>L. chmielewskii</i> | Inter | Outcross x self | Fruit mass                        | D        | 0               | 6          | 0.00  | 0.0238 | 14   |
| Plant   | <i>Lycopersicon esculentum</i> x <i>L. chmielewskii</i> | Inter | Outcross x self | Soluble solids conc.              | D        | 0               | 4          | 0.00  |        | 14   |
| Plant   | <i>Lycopersicon esculentum</i> x <i>L. chmielewskii</i> | Inter | Outcross x self | Fruit pH                          |          | 1               | 4          | 0.25  |        | 14   |
| Plant   | <i>Lycopersicon esculentum</i> x <i>L. hirsutum</i>     | Inter | Outcross x self | Wilting 6 h-PS                    |          | 1               | 3          | 0.33  |        | 15   |
| Plant   | <i>Lycopersicon esculentum</i> x <i>L. hirsutum</i>     | Inter | Outcross x self | Wilting 6 h-GS-ch5                |          | 3               | 7          | 0.43  | 1.0000 | 15   |
| Plant   | <i>Lycopersicon esculentum</i> x <i>L. hirsutum</i>     | Inter | Outcross x self | Wilting 6 h-GS-ch6                |          | 2               | 4          | 0.50  |        | 15   |
| Plant   | <i>Lycopersicon esculentum</i> x <i>L. hirsutum</i>     | Inter | Outcross x self | Wilting 6 h-GS-ch9                |          | 1               | 3          | 0.33  |        | 15   |
| Plant   | <i>Lycopersicon esculentum</i> x <i>L. hirsutum</i>     | Inter | Outcross x self | Unchilled ammonium uptake         |          | 0               | 2          | 0.00  |        | 15   |
| Plant   | <i>Lycopersicon esculentum</i> x <i>L. hirsutum</i>     | Inter | Outcross x self | Inhibition ammonium uptake        |          | 0               | 2          | 0.00  |        | 15   |
| Plant   | <i>Lycopersicon esculentum</i> x <i>L. hirsutum</i>     | Inter | Outcross x self | Stigma exertion                   |          | 0               | 1          | 0.00  |        | 16   |
| Plant   | <i>Lycopersicon esculentum</i> x <i>L. hirsutum</i>     | Inter | Outcross x self | Bud morphology                    |          | 0               | 7          | 0.00  | 0.0156 | 16   |
| Plant   | <i>Lycopersicon esculentum</i> x <i>L. hirsutum</i>     | Inter | Outcross x self | Flower size                       |          | 0               | 3          | 0.00  |        | 16   |
| Plant   | <i>Lycopersicon esculentum</i> x <i>L. hirsutum</i>     | Inter | Outcross x self | Number of flowers                 |          | 0               | 1          | 0.00  |        | 16   |
| Plant   | <i>Lycopersicon esculentum</i> x <i>L. hirsutum</i>     | Inter | Outcross x self | Inflorescence vegetative meristem |          | 0               | 2          | 0.00  |        | 16   |
| Plant   | <i>Lycopersicon esculentum</i> x <i>L. hirsutum</i>     | Inter | Outcross x self | Total yield                       | D        | 1               | 12         | 0.08  | 0.0052 | 17   |
| Plant   | <i>Lycopersicon esculentum</i> x <i>L. hirsutum</i>     | Inter | Outcross x self | Red yield                         | D        | 0               | 12         | 0.00  | 0.0004 | 17   |
| Plant   | <i>Lycopersicon esculentum</i> x <i>L. hirsutum</i>     | Inter | Outcross x self | Soluble solids                    | D        | 1               | 5          | 0.20  |        | 17   |
| Plant   | <i>Lycopersicon esculentum</i> x <i>L. hirsutum</i>     | Inter | Outcross x self | Brix Xx red yield                 | D        | 1               | 9          | 0.11  | 0.0391 | 17   |
| Plant   | <i>Lycopersicon esculentum</i> x <i>L. hirsutum</i>     | Inter | Outcross x self | Fruit color                       |          | 7               | 15         | 0.08  | 1.0000 | 17   |
| Plant   | <i>Lycopersicon esculentum</i> x <i>L. hirsutum</i>     | Inter | Outcross x self | Firmness                          |          | 0               | 3          | 0.00  |        | 17   |
| Plant   | <i>Lycopersicon esculentum</i> x <i>L. hirsutum</i>     | Inter | Outcross x self | Fruit weight                      | D        | 0               | 3          | 0.00  |        | 17   |
| Plant   | <i>Lycopersicon esculentum</i> x <i>L. hirsutum</i>     | Inter | Outcross x self | pH                                |          | 5               | 10         | 0.50  | 1.0000 | 17   |
| Plant   | <i>Lycopersicon esculentum</i> x <i>L. hirsutum</i>     | Inter | Outcross x self | % stem reduction                  |          | 1               | 6          | 0.17  | 0.1667 | 17   |
| Plant   | <i>Lycopersicon esculentum</i> x <i>L. hirsutum</i>     | Inter | Outcross x self | Cover                             |          | 3               | 6          | 0.50  | 1.0000 | 17   |
| Plant   | <i>Lycopersicon esculentum</i> x <i>L. hirsutum</i>     | Inter | Outcross x self | Puffiness                         |          | 0               | 2          | 0.00  |        | 17   |
| Plant   | <i>Lycopersicon esculentum</i> x <i>L. hirsutum</i>     | Inter | Outcross x self | Viscosity                         |          | 0               | 1          | 0.00  |        | 17   |
| Plant   | <i>Lycopersicon esculentum</i> x <i>L. hirsutum</i>     | Inter | Outcross x self | Fruit shape                       |          | 1               | 9          | 0.11  | 0.0391 | 17   |
| Plant   | <i>Lycopersicon esculentum</i> x <i>L. hirsutum</i>     | Inter | Outcross x self | % green yield                     | D        | 0               | 11         | 0.00  | 0.0010 | 17   |
| Plant   | <i>Lycopersicon esculentum</i> x <i>L. hirsutum</i>     | Inter | Outcross x self | Maturity                          |          | 0               | 6          | 0.00  | 0.0238 | 17   |
| Plant   | <i>Lycopersicon esculentum</i> x <i>L. hirsutum</i>     | Inter | Outcross x self | Horticultural acceptability       |          | 2               | 12         | 0.17  | 0.0315 | 17   |
| Plant   | <i>Lycopersicon esculentum</i> x <i>L. parviflorum</i>  | Inter | Outcross x self | Total yield                       | D        | 1               | 5          | 0.20  |        | 18   |
| Plant   | <i>Lycopersicon esculentum</i> x <i>L. parviflorum</i>  | Inter | Outcross x self | Red yield                         | D        | 0               | 4          | 0.00  |        | 18   |
| Plant   | <i>Lycopersicon esculentum</i> x <i>L. parviflorum</i>  | Inter | Outcross x self | Fruit weight                      | D        | 1               | 8          | 0.13  | 0.0552 | 18   |
| Plant   | <i>Lycopersicon esculentum</i> x <i>L. parviflorum</i>  | Inter | Outcross x self | Viscosity of the serum            |          | 0               | 11         | 0.00  | 0.0010 | 18   |
| Plant   | <i>Lycopersicon esculentum</i> x <i>L. parviflorum</i>  | Inter | Outcross x self | Fruit viscosity                   |          | 0               | 3          | 0.00  |        | 18   |
| Plant   | <i>Lycopersicon esculentum</i> x <i>L. parviflorum</i>  | Inter | Outcross x self | Soluble solids                    | D        | 0               | 5          | 0.00  |        | 18   |
| Plant   | <i>Lycopersicon esculentum</i> x <i>L. parviflorum</i>  | Inter | Outcross x self | Brix X red yield                  | D        | 0               | 2          | 0.00  |        | 18   |
| Plant   | <i>Lycopersicon esculentum</i> x <i>L. parviflorum</i>  | Inter | Outcross x self | Yellow                            |          | 0               | 1          | 0.00  |        | 18   |

| Kingdom | Species                                         | Cross | Mating system   | Trait                       | Dom. (D) | No. antag. QTLs | Total QTLs | Ratio | P      | Ref. |
|---------|-------------------------------------------------|-------|-----------------|-----------------------------|----------|-----------------|------------|-------|--------|------|
| Plant   | <i>Lycopersicon esculentum x L. parviflorum</i> | Inter | Outcross x self | Internal fruit color        |          | 7               | 15         | 0.47  | 1.0000 | 18   |
| Plant   | <i>Lycopersicon esculentum x L. parviflorum</i> | Inter | Outcross x self | External fruit color        |          | 4               | 9          | 0.44  | 1.0000 | 18   |
| Plant   | <i>Lycopersicon esculentum x L. parviflorum</i> | Inter | Outcross x self | Fruit color, lab            |          | 0               | 4          | 0.00  |        | 18   |
| Plant   | <i>Lycopersicon esculentum x L. parviflorum</i> | Inter | Outcross x self | Internal gel color          |          | 0               | 2          | 0.00  |        | 18   |
| Plant   | <i>Lycopersicon esculentum x L. parviflorum</i> | Inter | Outcross x self | Lycopene                    |          | 2               | 5          | 0.40  |        | 18   |
| Plant   | <i>Lycopersicon esculentum x L. parviflorum</i> | Inter | Outcross x self | Beta-carotene               |          | 1               | 6          | 0.17  | 0.1667 | 18   |
| Plant   | <i>Lycopersicon esculentum x L. parviflorum</i> | Inter | Outcross x self | Stem scar                   |          | 4               | 11         | 0.36  | 0.5494 | 18   |
| Plant   | <i>Lycopersicon esculentum x L. parviflorum</i> | Inter | Outcross x self | Epidermal reticulation      |          | 0               | 4          | 0.00  |        | 18   |
| Plant   | <i>Lycopersicon esculentum x L. parviflorum</i> | Inter | Outcross x self | Shoulders                   |          | 0               | 1          | 0.00  |        | 18   |
| Plant   | <i>Lycopersicon esculentum x L. parviflorum</i> | Inter | Outcross x self | Stem release                |          | 1               | 6          | 0.17  | 0.1667 | 18   |
| Plant   | <i>Lycopersicon esculentum x L. parviflorum</i> | Inter | Outcross x self | Fruit shape                 |          | 6               | 16         | 0.38  | 0.3799 | 18   |
| Plant   | <i>Lycopersicon esculentum x L. parviflorum</i> | Inter | Outcross x self | Firmness                    |          | 6               | 12         | 0.50  | 1.0000 | 18   |
| Plant   | <i>Lycopersicon esculentum x L. parviflorum</i> | Inter | Outcross x self | Total acids                 |          | 2               | 4          | 0.50  |        | 18   |
| Plant   | <i>Lycopersicon esculentum x L. parviflorum</i> | Inter | Outcross x self | Total organic acids         |          | 0               | 2          | 0.00  |        | 18   |
| Plant   | <i>Lycopersicon esculentum x L. parviflorum</i> | Inter | Outcross x self | pH                          |          | 2               | 10         | 0.20  | 0.0879 | 18   |
| Plant   | <i>Lycopersicon esculentum x L. parviflorum</i> | Inter | Outcross x self | Maturity                    |          | 1               | 6          | 0.17  | 0.1667 | 18   |
| Plant   | <i>Lycopersicon esculentum x L. parviflorum</i> | Inter | Outcross x self | Horticultural acceptability |          | 1               | 3          | 0.33  |        | 18   |
| Plant   | <i>Lycopersicon esculentum x L. parviflorum</i> | Inter | Outcross x self | Cover                       |          | 5               | 18         | 0.28  | 0.0593 | 18   |
| Plant   | <i>Lycopersicon esculentum x L. parviflorum</i> | Inter | Outcross x self | Internal core               |          | 1               | 3          | 0.33  |        | 18   |
| Plant   | <i>Lycopersicon esculentum x L. parviflorum</i> | Inter | Outcross x self | Puffiness                   |          | 5               | 13         | 0.38  | 0.5811 | 18   |
| Plant   | <i>Lycopersicon esculentum x L. parviflorum</i> | Inter | Outcross x self | Pericarp thickness          |          | 2               | 7          | 0.29  | 0.4531 | 18   |
| Plant   | <i>Lycopersicon esculentum x L. parviflorum</i> | Inter | Outcross x self | Veins                       |          | 1               | 2          | 0.50  |        | 18   |
| Plant   | <i>Lycopersicon esculentum x L. peruvianum</i>  | Inter | Outcross x self | Total yield - CA1           | D        | 1               | 8          | 0.13  | 0.0552 | 19   |
| Plant   | <i>Lycopersicum esculentum x L. peruvianum</i>  | Inter | Outcross x self | Red yield - CA1             | D        | 1               | 9          | 0.11  | 0.0391 | 19   |
| Plant   | <i>Lycopersicum esculentum x L. peruvianum</i>  | Inter | Outcross x self | Fruit weight - CA1          | D        | 2               | 10         | 0.20  | 0.0879 | 19   |
| Plant   | <i>Lycopersicum esculentum x L. peruvianum</i>  | Inter | Outcross x self | Green yield - CA1           | D        | 1               | 4          | 0.25  |        | 19   |
| Plant   | <i>Lycopersicum esculentum x L. peruvianum</i>  | Inter | Outcross x self | Brix - CA1                  | D        | 0               | 4          | 0.00  |        | 19   |
| Plant   | <i>Lycopersicum esculentum x L. peruvianum</i>  | Inter | Outcross x self | Viscosity - CA1             |          | 0               | 3          | 0.00  |        | 19   |
| Plant   | <i>Lycopersicum esculentum x L. peruvianum</i>  | Inter | Outcross x self | Fruit color, lab - CA1      |          | 1               | 7          | 0.14  | 0.1250 | 19   |
| Plant   | <i>Lycopersicum esculentum x L. peruvianum</i>  | Inter | Outcross x self | Fruit color, external - CA1 |          | 1               | 3          | 0.33  |        | 19   |
| Plant   | <i>Lycopersicum esculentum x L. peruvianum</i>  | Inter | Outcross x self | Fruit color, Internal - CA1 |          | 0               | 1          | 0.00  |        | 19   |
| Plant   | <i>Lycopersicum esculentum x L. peruvianum</i>  | Inter | Outcross x self | Fruit shape - CA1           |          | 1               | 10         | 0.10  | 0.0173 | 19   |
| Plant   | <i>Lycopersicum esculentum x L. peruvianum</i>  | Inter | Outcross x self | Firmness - CA1              |          | 1               | 3          | 0.33  |        | 19   |
| Plant   | <i>Lycopersicum esculentum x L. peruvianum</i>  | Inter | Outcross x self | First ripe - CA1            |          | 1               | 3          | 0.33  |        | 19   |
| Plant   | <i>Lycopersicum esculentum x L. peruvianum</i>  | Inter | Outcross x self | Stem release - CA1          |          | 0               | 3          | 0.00  |        | 19   |
| Plant   | <i>Lycopersicum esculentum x L. peruvianum</i>  | Inter | Outcross x self | Cover - CA1                 |          | 1               | 7          | 0.14  | 0.1250 | 19   |
| Plant   | <i>Lycopersicum esculentum x L. peruvianum</i>  | Inter | Outcross x self | Growth - CA1                |          | 1               | 6          | 0.17  | 0.1667 | 19   |
| Plant   | <i>Lycopersicum esculentum x L. peruvianum</i>  | Inter | Outcross x self | Hortic.accept. - CA1        |          | 1               | 7          | 0.14  | 0.1250 | 19   |
| Plant   | <i>Lycopersicum esculentum x L. peruvianum</i>  | Inter | Outcross x self | pH                          |          | 1               | 5          | 0.20  |        | 19   |
| Plant   | <i>Lycopersicum esculentum x L. peruvianum</i>  | Inter | Outcross x self | Fruit weight – CA2          | D        | 1               | 6          | 0.17  | 0.1667 | 19   |
| Plant   | <i>Lycopersicum esculentum x L. peruvianum</i>  | Inter | Outcross x self | Brix – CA2                  | D        | 0               | 8          | 0.00  | 0.0061 | 19   |
| Plant   | <i>Lycopersicum esculentum x L. peruvianum</i>  | Inter | Outcross x self | Viscosity – CA2             |          | 0               | 3          | 0.00  |        | 19   |
| Plant   | <i>Lycopersicum esculentum x L. peruvianum</i>  | Inter | Outcross x self | Fruit color, lab – CA2      |          | 0               | 1          | 0.00  |        | 19   |

| Kingdom | Species                                        | Cross | Mating system   | Trait                       | Dom. (D) | No. antag. QTLs | Total QTLs | Ratio | P      | Ref. |
|---------|------------------------------------------------|-------|-----------------|-----------------------------|----------|-----------------|------------|-------|--------|------|
| Plant   | <i>Lycopersicon esculentum x L. peruvianum</i> | Inter | Outcross x self | Fruit color, external – CA2 |          | 0               | 2          | 0.00  |        | 19   |
| Plant   | <i>Lycopersicon esculentum x L. peruvianum</i> | Inter | Outcross x self | Fruit shape – CA2           |          | 2               | 11         | 0.18  | 0.0654 | 19   |
| Plant   | <i>Lycopersicon esculentum x L. peruvianum</i> | Inter | Outcross x self | Firmness – CA2              |          | 2               | 5          | 0.40  |        | 19   |
| Plant   | <i>Lycopersicon esculentum x L. peruvianum</i> | Inter | Outcross x self | Cover – CA2                 |          | 1               | 7          | 0.14  | 0.1250 | 19   |
| Plant   | <i>Lycopersicon esculentum x L. peruvianum</i> | Inter | Outcross x self | Growth – CA2                |          | 1               | 6          | 0.17  | 0.1667 | 19   |
| Plant   | <i>Lycopersicon esculentum x L. peruvianum</i> | Inter | Outcross x self | Horticult accept. – CA2     |          | 1               | 7          | 0.14  | 0.1250 | 19   |
| Plant   | <i>Lycopersicon esculentum x L. peruvianum</i> | Inter | Outcross x self | pH – CA2                    |          | 1               | 2          | 0.50  |        | 19   |
| Plant   | <i>Lycopersicon esculentum x L. peruvianum</i> | Inter | Outcross x self | Total yield – S             | D        | 1               | 8          | 0.13  | 0.0552 | 19   |
| Plant   | <i>Lycopersicon esculentum x L. peruvianum</i> | Inter | Outcross x self | Red yield – S               | D        | 1               | 10         | 0.10  | 0.0173 | 19   |
| Plant   | <i>Lycopersicon esculentum x L. peruvianum</i> | Inter | Outcross x self | Fruit weight – S            | D        | 2               | 9          | 0.22  | 0.1797 | 19   |
| Plant   | <i>Lycopersicon esculentum x L. peruvianum</i> | Inter | Outcross x self | Small fruit – S             | D        | 0               | 5          | 0.00  |        | 19   |
| Plant   | <i>Lycopersicon esculentum x L. peruvianum</i> | Inter | Outcross x self | Large fruit – S             | D        | 1               | 3          | 0.33  |        | 19   |
| Plant   | <i>Lycopersicon esculentum x L. peruvianum</i> | Inter | Outcross x self | Green yield – S             | D        | 0               | 4          | 0.00  |        | 19   |
| Plant   | <i>Lycopersicon esculentum x L. peruvianum</i> | Inter | Outcross x self | Brix – S                    | D        | 0               | 8          | 0.00  | 0.0061 | 19   |
| Plant   | <i>Lycopersicon esculentum x L. peruvianum</i> | Inter | Outcross x self | Brix X red yield – S        | D        | 0               | 6          | 0.00  | 0.0238 | 19   |
| Plant   | <i>Lycopersicon esculentum x L. peruvianum</i> | Inter | Outcross x self | Brix X total yield – S      | D        | 0               | 8          | 0.00  | 0.0061 | 19   |
| Plant   | <i>Lycopersicon esculentum x L. peruvianum</i> | Inter | Outcross x self | Viscosity – S               |          | 0               | 3          | 0.00  |        | 19   |
| Plant   | <i>Lycopersicon esculentum x L. peruvianum</i> | Inter | Outcross x self | Fruit color, lab – S        |          | 1               | 8          | 0.13  | 0.0552 | 19   |
| Plant   | <i>Lycopersicon esculentum x L. peruvianum</i> | Inter | Outcross x self | Fruit color, external – S   |          | 1               | 3          | 0.33  |        | 19   |
| Plant   | <i>Lycopersicon esculentum x L. peruvianum</i> | Inter | Outcross x self | Fruit color, Internal – S   |          | 1               | 2          | 0.50  |        | 19   |
| Plant   | <i>Lycopersicon esculentum x L. peruvianum</i> | Inter | Outcross x self | Fruit shape – S             |          | 2               | 12         | 0.17  | 0.0315 | 19   |
| Plant   | <i>Lycopersicon esculentum x L. peruvianum</i> | Inter | Outcross x self | Firmness – S                |          | 3               | 6          | 0.50  | 1.0000 | 19   |
| Plant   | <i>Lycopersicon esculentum x L. peruvianum</i> | Inter | Outcross x self | First ripe – S              |          | 1               | 4          | 0.25  |        | 19   |
| Plant   | <i>Lycopersicon esculentum x L. peruvianum</i> | Inter | Outcross x self | Maturity – S                |          | 1               | 5          | 0.20  |        | 19   |
| Plant   | <i>Lycopersicon esculentum x L. peruvianum</i> | Inter | Outcross x self | Overmaturity – S            |          | 0               | 3          | 0.00  |        | 19   |
| Plant   | <i>Lycopersicon esculentum x L. peruvianum</i> | Inter | Outcross x self | Stem release – S            |          | 0               | 2          | 0.00  |        | 19   |
| Plant   | <i>Lycopersicon esculentum x L. peruvianum</i> | Inter | Outcross x self | Sunscald – S                |          | 1               | 4          | 0.25  |        | 19   |
| Plant   | <i>Lycopersicon esculentum x L. peruvianum</i> | Inter | Outcross x self | Stigma exsertion – S        |          | 0               | 2          | 0.00  |        | 19   |
| Plant   | <i>Lycopersicon esculentum x L. peruvianum</i> | Inter | Outcross x self | Puffiness – S               |          | 0               | 1          | 0.00  |        | 19   |
| Plant   | <i>Lycopersicon esculentum x L. peruvianum</i> | Inter | Outcross x self | Cover – S                   |          | 1               | 5          | 0.20  |        | 19   |
| Plant   | <i>Lycopersicon esculentum x L. peruvianum</i> | Inter | Outcross x self | Unhealthy – S               |          | 0               | 2          | 0.00  |        | 19   |
| Plant   | <i>Lycopersicon esculentum x L. peruvianum</i> | Inter | Outcross x self | pH – S                      |          | 0               | 2          | 0.00  |        | 19   |
| Plant   | <i>Lycopersicon esculentum x L. peruvianum</i> | Inter | Outcross x self | Total yield – I             | D        | 1               | 9          | 0.11  | 0.0391 | 19   |
| Plant   | <i>Lycopersicon esculentum x L. peruvianum</i> | Inter | Outcross x self | Red yield – I               | D        | 2               | 10         | 0.20  | 0.0879 | 19   |
| Plant   | <i>Lycopersicon esculentum x L. peruvianum</i> | Inter | Outcross x self | Fruit weight – I            | D        | 2               | 10         | 0.20  | 0.0879 | 19   |
| Plant   | <i>Lycopersicon esculentum x L. peruvianum</i> | Inter | Outcross x self | Green yield – I             | D        | 0               | 6          | 0.00  | 0.0238 | 19   |
| Plant   | <i>Lycopersicon esculentum x L. peruvianum</i> | Inter | Outcross x self | Brix – I                    | D        | 0               | 4          | 0.00  |        | 19   |
| Plant   | <i>Lycopersicon esculentum x L. peruvianum</i> | Inter | Outcross x self | Brix X red yield – I        | D        | 0               | 8          | 0.00  | 0.0061 | 19   |
| Plant   | <i>Lycopersicon esculentum x L. peruvianum</i> | Inter | Outcross x self | Brix X total yield – I      | D        | 0               | 8          | 0.00  | 0.0061 | 19   |
| Plant   | <i>Lycopersicon esculentum x L. peruvianum</i> | Inter | Outcross x self | Fruit color, Internal – I   |          | 0               | 1          | 0.00  |        | 19   |
| Plant   | <i>Lycopersicon esculentum x L. peruvianum</i> | Inter | Outcross x self | Fruit shape – I             |          | 2               | 9          | 0.22  | 0.1797 | 19   |
| Plant   | <i>Lycopersicon esculentum x L. peruvianum</i> | Inter | Outcross x self | Stem release – I            |          | 2               | 5          | 0.40  |        | 19   |
| Plant   | <i>Lycopersicon esculentum x L. peruvianum</i> | Inter | Outcross x self | Cover – I                   |          | 0               | 7          | 0.00  | 0.0156 | 19   |

| Kingdom | Species                                              | Cross | Mating system   | Trait                             | Dom. (D) | No. antag. QTLs | Total QTLs | Ratio | P      | Ref. |
|---------|------------------------------------------------------|-------|-----------------|-----------------------------------|----------|-----------------|------------|-------|--------|------|
| Plant   | <i>Lycopersicon esculentum x L. peruvianum</i>       | Inter | Outcross x self | pH – I                            |          | 1               | 6          | 0.17  | 0.1667 | 19   |
| Plant   | <i>Lycopersicon esculentum x L. peruvianum</i>       | Inter | Outcross x self | Gel – I                           |          | 0               | 2          | 0.00  |        | 19   |
| Plant   | <i>Lycopersicon esculentum x L. peruvianum</i>       | Inter | Outcross x self | Fruit weight - CU                 | D        | 2               | 10         | 0.20  | 0.0879 | 19   |
| Plant   | <i>Lycopersicon esculentum x L. peruvianum</i>       | Inter | Outcross x self | Self seed - CU                    |          | 1               | 3          | 0.33  |        | 19   |
| Plant   | <i>Lycopersicon esculentum x L. pennellii</i>        | Inter | Outcross x self | Acylsucroses                      |          | 0               | 4          | 0.00  |        | 20   |
| Plant   | <i>Lycopersicon esculentum x L. pennellii</i>        | Inter | Outcross x self | Total acylsugars                  |          | 0               | 3          | 0.00  |        | 20   |
| Plant   | <i>Lycopersicon esculentum x L. pennellii</i>        | Inter | Outcross x self | Percent acylglucososes            |          | 1               | 3          | 0.33  |        | 20   |
| Plant   | <i>Lycopersicon esculentum x L. pennellii</i>        | Inter | Outcross x self | Acylglucososes                    |          | 0               | 1          | 0.00  |        | 20   |
| Plant   | <i>Lycopersicon esculentum x L. pennellii</i>        | Inter | Outcross x self | Days to first true leaf           |          | 1               | 3          | 0.33  |        | 21   |
| Plant   | <i>Lycopersicon esculentum x L. pennellii</i>        | Inter | Outcross x self | Days to first flower              |          | 1               | 7          | 0.14  | 0.1250 | 21   |
| Plant   | <i>Lycopersicon esculentum x L. pennellii</i>        | Inter | Outcross x self | Height                            |          | 4               | 9          | 0.44  | 1.0000 | 21   |
| Plant   | <i>Lycopersicon esculentum x L. pennellii</i>        | Inter | Outcross x self | No. of flower buds                |          | 4               | 10         | 0.40  | 0.6060 | 21   |
| Plant   | <i>Lycopersicon esculentum x L. pennellii</i>        | Inter | Outcross x self | No. of Internodes on primary stem |          | 2               | 5          | 0.40  |        | 21   |
| Plant   | <i>Lycopersicon esculentum x L. pennellii</i>        | Inter | Outcross x self | No. of Internodes – total         |          | 4               | 9          | 0.44  | 1.0000 | 21   |
| Plant   | <i>Lycopersicon esculentum x L. pennellii</i>        | Inter | Outcross x self | No. of branches                   |          | 3               | 8          | 0.38  | 0.5706 | 21   |
| Plant   | <i>Lycopersicon esculentum x L. pennellii</i>        | Inter | Outcross x self | Total fresh weight                |          | 1               | 2          | 0.50  |        | 21   |
| Plant   | <i>Lycopersicon esculentum x L. pennellii</i>        | Inter | Outcross x self | Total dry weight                  |          | 1               | 5          | 0.20  |        | 21   |
| Plant   | <i>Lycopersicon esculentum x L. pennellii</i>        | Inter | Outcross x self | Stem diameter                     |          | 3               | 7          | 0.43  | 1.0000 | 21   |
| Plant   | <i>Lycopersicon esculentum x L. pennellii</i>        | Inter | Outcross x self | Leaflet width/length              |          | 1               | 9          | 0.11  | 0.0391 | 21   |
| Plant   | <i>Lycopersicon esculentum x L. pimpinellifolium</i> | Inter | Outcross x self | Soluble solids                    | D        | 1               | 12         | 0.08  | 0.0052 | 22   |
| Plant   | <i>Lycopersicon esculentum x L. pimpinellifolium</i> | Inter | Outcross x self | Fruit weight                      | D        | 1               | 18         | 0.06  | 0.0002 | 22   |
| Plant   | <i>Lycopersicon esculentum x L. pimpinellifolium</i> | Inter | Outcross x self | Fruit color                       |          | 2               | 5          | 0.40  |        | 22   |
| Plant   | <i>Lycopersicon esculentum x L. pimpinellifolium</i> | Inter | Outcross x self | Fruit pH                          |          | 2               | 5          | 0.40  |        | 22   |
| Plant   | <i>Lycopersicon esculentum x L. pimpinellifolium</i> | Inter | Outcross x self | Total yield                       | D        | 1               | 6          | 0.17  | 0.1667 | 22   |
| Plant   | <i>Lycopersicon esculentum x L. pimpinellifolium</i> | Inter | Outcross x self | Red yield                         | D        | 0               | 2          | 0.00  |        | 22   |
| Plant   | <i>Lycopersicon esculentum x L. pimpinellifolium</i> | Inter | Outcross x self | Brix X red yield                  | D        | 1               | 4          | 0.25  |        | 22   |
| Plant   | <i>Lycopersicon esculentum x L. pimpinellifolium</i> | Inter | Outcross x self | Fertility                         |          | 0               | 2          | 0.00  |        | 22   |
| Plant   | <i>Lycopersicon esculentum x L. pimpinellifolium</i> | Inter | Outcross x self | Puffiness                         |          | 1               | 5          | 0.20  |        | 22   |
| Plant   | <i>Lycopersicon esculentum x L. pimpinellifolium</i> | Inter | Outcross x self | Viscosity                         |          | 0               | 1          | 0.00  |        | 22   |
| Plant   | <i>Lycopersicon esculentum x L. pimpinellifolium</i> | Inter | Outcross x self | Fruit shape                       |          | 2               | 4          | 0.50  |        | 22   |
| Plant   | <i>Lycopersicon esculentum x L. pimpinellifolium</i> | Inter | Outcross x self | % stem release                    |          | 1               | 4          | 0.25  |        | 22   |

| Kingdom | Species                                              | Cross | Mating system   | Trait                    | Dom. (D) | No. antag. QTLs | Total QTLs | Ratio | P      | Ref. |
|---------|------------------------------------------------------|-------|-----------------|--------------------------|----------|-----------------|------------|-------|--------|------|
| Plant   | <i>Lycopersicon esculentum x L. pimpinellifolium</i> | Inter | Outcross x self | Firmness                 |          | 1               | 4          | 0.25  |        | 22   |
| Plant   | <i>Lycopersicon esculentum x L. pimpinellifolium</i> | Inter | Outcross x self | Vegetative growth        |          | 3               | 6          | 0.50  | 1.0000 | 22   |
| Plant   | <i>Lycopersicon esculentum x L. pimpinellifolium</i> | Inter | Outcross x self | Sunscald                 |          | 1               | 2          | 0.50  |        | 22   |
| Plant   | <i>Lycopersicon esculentum x L. pimpinellifolium</i> | Inter | Outcross x self | Time to maturity         |          | 3               | 7          | 0.43  | 1.0000 | 22   |
| Plant   | <i>Lycopersicon esculentum x L. pimpinellifolium</i> | Inter | Outcross x self | Cover                    |          | 3               | 6          | 0.50  | 1.0000 | 22   |
| Plant   | <i>Lycopersicon esculentum x L. pimpinellifolium</i> | Inter | Outcross x self | Fruit ripening           |          | 1               | 4          | 0.25  |        | 22   |
| Plant   | <i>Lycopersicon esculentum x L. pimpinellifolium</i> | Inter | Outcross x self | Fruit weight             | D        | 0               | 6          | 0.06  | 0.0238 | 23   |
| Plant   | <i>Lycopersicon esculentum x L. pimpinellifolium</i> | Inter | Outcross x self | Fruit length             | D        | 0               | 7          | 0.06  | 0.0156 | 23   |
| Plant   | <i>Lycopersicon esculentum x L. pimpinellifolium</i> | Inter | Outcross x self | Fruit diameter           | D        | 0               | 7          | 0.06  | 0.0156 | 23   |
| Plant   | <i>Lycopersicon esculentum x L. pimpinellifolium</i> | Inter | Outcross x self | Fruit shape              |          | 0               | 1          | 0.06  |        | 23   |
| Plant   | <i>Lycopersicon esculentum x L. pimpinellifolium</i> | Inter | Outcross x self | No. of seeds/fruit       |          | 0               | 2          | 0.06  |        | 23   |
| Plant   | <i>Lycopersicon esculentum x L. pimpinellifolium</i> | Inter | Outcross x self | Seed weight              |          | 0               | 4          | 0.06  |        | 23   |
| Plant   | <i>Lycopersicon esculentum x L. pimpinellifolium</i> | Inter | Outcross x self | Locule number            |          | 0               | 3          | 0.06  |        | 23   |
| Plant   | <i>Lycopersicon esculentum x L. pimpinellifolium</i> | Inter | Outcross x self | Fruit weight             | D        | 0               | 7          | 0.00  | 0.0156 | 24   |
| Plant   | <i>Lycopersicon esculentum x L. pimpinellifolium</i> | Inter | Outcross x self | Fruit color              |          | 0               | 2          | 0.00  |        | 24   |
| Plant   | <i>Lycopersicon esculentum x L. pimpinellifolium</i> | Inter | Outcross x self | Soluble solids           | D        | 0               | 3          | 0.00  |        | 24   |
| Plant   | <i>Lycopersicon esculentum x L. pimpinellifolium</i> | Inter | Outcross x self | Fruit diameter           | D        | 0               | 3          | 0.00  |        | 24   |
| Plant   | <i>Lycopersicon esculentum x L. pimpinellifolium</i> | Inter | Outcross x self | Fruit pericarp thickness |          | 0               | 4          | 0.00  |        | 24   |
| Plant   | <i>Lycopersicon esculentum x L. pimpinellifolium</i> | Inter | Outcross x self | Fruit shape              |          | 0               | 2          | 0.00  |        | 24   |
| Plant   | <i>Lycopersicon esculentum x L. pimpinellifolium</i> | Inter | Outcross x self | Locule number            |          | 0               | 2          | 0.00  |        | 24   |
| Plant   | <i>Lycopersicon esculentum x L. pimpinellifolium</i> | Inter | Outcross x self | No. of seeds/fruit       |          | 1               | 4          | 0.25  |        | 24   |
| Plant   | <i>Lycopersicon esculentum x L. pimpinellifolium</i> | Inter | Outcross x self | Seed weight              |          | 2               | 4          | 0.50  |        | 24   |

| Kingdom | Species                                                | Cross | Mating system   | Trait                            | Dom. (D) | No. antag. QTLs | Total QTLs | Ratio | P      | Ref. |
|---------|--------------------------------------------------------|-------|-----------------|----------------------------------|----------|-----------------|------------|-------|--------|------|
| Plant   | <i>Lycopersicon esculentum x L. pimpinellifolium</i>   | Inter | Outcross x self | Anther tube width                |          | 0               | 2          | 0.00  |        | 24   |
| Plant   | <i>Lycopersicon esculentum x L. pimpinellifolium</i>   | Inter | Outcross x self | Anther tube length               |          | 0               | 2          | 0.00  |        | 24   |
| Plant   | <i>Lycopersicon esculentum x L. pimpinellifolium</i>   | Inter | Outcross x self | Anther tube shape                |          | 1               | 2          | 0.50  |        | 24   |
| Plant   | <i>Lycopersicon esculentum x L. pimpinellifolium</i>   | Inter | Outcross x self | No. of flowers                   |          | 0               | 3          | 0.00  |        | 24   |
| Plant   | <i>Lycopersicon esculentum x L. pimpinellifolium</i>   | Inter | Outcross x self | Days to emergence                |          | 1               | 3          | 0.33  |        | 24   |
| Plant   | <i>Lycopersicon esculentum x L. pimpinellifolium</i>   | Inter | Outcross x self | Days to third leaf               |          | 0               | 3          | 0.00  |        | 24   |
| Plant   | <i>Lycopersicon esculentum x L. pimpinellifolium</i>   | Inter | Outcross x self | Days to first flower             |          | 0               | 2          | 0.00  |        | 24   |
| Plant   | <i>Lycopersicon esculentum x L. pimpinellifolium</i>   | Inter | Outcross x self | Days to first fruit              |          | 0               | 2          | 0.00  |        | 24   |
| Plant   | <i>Lycopersicon esculentum x L. pimpinellifolium</i>   | Inter | Outcross x self | Days to ripening                 |          | 0               | 3          | 0.00  |        | 24   |
| Plant   | <i>Lycopersicon esculentum x L. pimpinellifolium</i>   | Inter | Outcross x self | Plant height                     |          | 0               | 1          | 0.00  |        | 24   |
| Plant   | <i>Lycopersicon esculentum x L. pimpinellifolium</i>   | Inter | Outcross x self | Fruit shape                      |          | 0               | 4          | 0.00  |        | 25   |
| Plant   | <i>Lycopersicon esculentum x L. pimpinellifolium</i>   | Inter | Outcross x self | Pericarp elongation index        |          | 0               | 1          | 0.00  |        | 25   |
| Plant   | <i>Lycopersicon esculentum x L. pimpinellifolium</i>   | Inter | Outcross x self | Eccentricity index               |          | 0               | 3          | 0.00  |        | 25   |
| Plant   | <i>Lycopersicon esculentum x L. pimpinellifolium</i>   | Inter | Outcross x self | Salt tolerance                   |          | 1               | 7          | 0.14  | 0.1250 | 26   |
| Plant   | <i>Lycopersicon esculentum x L. pimpinellifolium</i>   | Inter | Outcross x self | Time to germination, nonstress   | D        | 0               | 5          | 0.00  |        | 27   |
| Plant   | <i>Lycopersicon esculentum x L. pimpinellifolium</i>   | Inter | Outcross x self | Time to germination, cold stress |          | 2               | 6          | 0.33  | 0.5238 | 27   |
| Plant   | <i>Lycopersicon esculentum x L. pimpinellifolium</i>   | Inter | Outcross x self | Time to germination, salt stress |          | 1               | 7          | 0.14  | 0.1250 | 27   |
| Plant   | <i>Lycopersicon pennellii</i>                          | Intra | Outcross        | Trichome density                 |          | 1               | 7          | 0.14  | 0.1250 | 28   |
| Plant   | <i>Lycopersicon pennellii</i>                          | Inter | Outcross        | Acylsugar level                  |          | 2               | 7          | 0.29  | 0.4531 | 28   |
| Plant   | <i>Lycopersicon pennellii</i>                          | Inter | Outcross        | Percentage acylglucoses          |          | 1               | 4          | 0.25  |        | 28   |
| Plant   | <i>Lycopersicon esculentum x several other species</i> | Inter | Outcross x self | Seed weight                      |          | 6               | 14         | 0.43  | 0.6536 | 29   |
| Plant   | <i>Oryza japonica</i>                                  | Intra | Self            | Stem coloration                  |          | 0               | 1          | 0.00  |        | 30   |
| Plant   | <i>Oryza japonica</i>                                  | Intra | Self            | Pericarp coloration              |          | 0               | 2          | 0.00  |        | 30   |
| Plant   | <i>Oryza japonica</i>                                  | Intra | Self            | Plant type                       |          | 1               | 2          | 0.50  |        | 30   |
| Plant   | <i>Oryza japonica</i>                                  | Intra | Self            | Awning                           |          | 0               | 2          | 0.00  |        | 30   |
| Plant   | <i>Oryza japonica</i>                                  | Intra | Self            | Shattering                       | D        | 0               | 1          | 0.00  |        | 30   |



| Kingdom | Species                            | Cross | Mating system   | Trait                      | Dom.<br>(D) | No.<br>antag.<br>QTLs | Total<br>QTLs | Ratio | P      | Ref. |
|---------|------------------------------------|-------|-----------------|----------------------------|-------------|-----------------------|---------------|-------|--------|------|
| Plant   | <i>Oryza japonica</i>              | Intra | Self            | Plant height               |             | 1                     | 2             | 0.50  |        | 30   |
| Plant   | <i>Oryza japonica</i>              | Intra | Self            | Heading date               |             | 1                     | 3             | 0.33  |        | 30   |
| Plant   | <i>Oryza japonica</i>              | Intra | Self            | Tiller number              |             | 0                     | 2             | 0.00  |        | 30   |
| Plant   | <i>Oryza japonica</i>              | Intra | Self            | Leaf width                 |             | 0                     | 1             | 0.00  |        | 30   |
| Plant   | <i>Oryza japonica</i>              | Intra | Self            | Panicle length             |             | 0                     | 1             | 0.00  |        | 30   |
| Plant   | <i>Oryza japonica</i>              | Intra | Self            | Spikelets/panicle          |             | 0                     | 1             | 0.00  |        | 30   |
| Plant   | <i>Oryza japonica</i>              | Intra | Self            | Primary branches/panicle   |             | 1                     | 2             | 0.50  |        | 30   |
| Plant   | <i>Oryza japonica</i>              | Intra | Self            | Secondary branches/panicle |             | 1                     | 2             | 0.50  |        | 30   |
| Plant   | <i>Oryza japonica</i>              | Intra | Self            | Grain length               | D           | 1                     | 2             | 0.50  |        | 30   |
| Plant   | <i>Oryza japonica</i>              | Intra | Self            | Grain width                | D           | 0                     | 1             | 0.00  |        | 30   |
| Plant   | <i>Oryza japonica</i>              | Intra | Self            | Grain pilosity             |             | 0                     | 1             | 0.00  |        | 30   |
| Plant   | <i>Oryza sativa x O. rufipogon</i> | Inter | Outcross x self | Regeneration ability       |             | 1                     | 4             | 0.25  |        | 31   |
| Plant   | <i>Oryza sativa x O. rufipogon</i> | Inter | Outcross x self | Plant height               |             | 1                     | 4             | 0.25  |        | 31   |
| Plant   | <i>Oryza sativa x O. rufipogon</i> | Inter | Outcross x self | Tillers/Plant              |             | 0                     | 2             | 0.00  |        | 31   |
| Plant   | <i>Oryza sativa x O. rufipogon</i> | Inter | Outcross x self | Anther length              |             | 1                     | 7             | 0.14  | 0.1250 | 31   |
| Plant   | <i>Oryza sativa x O. rufipogon</i> | Inter | Outcross x self | Panicle length             |             | 0                     | 2             | 0.00  |        | 31   |
| Plant   | <i>Oryza sativa x O. rufipogon</i> | Inter | Outcross x self | Culm circumference         |             | 2                     | 5             | 0.40  |        | 31   |
| Plant   | <i>Oryza sativa x O. rufipogon</i> | Inter | Outcross x self | Panicle neck length        |             | 1                     | 4             | 0.25  |        | 31   |
| Plant   | <i>Oryza sativa x O. rufipogon</i> | Inter | Outcross x self | Secondary branches/panicle |             | 1                     | 2             | 0.50  |        | 31   |
| Plant   | <i>Oryza sativa x O. rufipogon</i> | Inter | Outcross x self | Shattering                 | D           | 1                     | 5             | 0.20  |        | 31   |
| Plant   | <i>Oryza sativa x O. rufipogon</i> | Inter | Outcross x self | Spikelets/panicle          |             | 1                     | 3             | 0.33  |        | 31   |
| Plant   | <i>Oryza sativa x O. rufipogon</i> | Inter | Outcross x self | Spikelet density           |             | 1                     | 2             | 0.50  |        | 31   |
| Plant   | <i>Oryza sativa x O. rufipogon</i> | Inter | Outcross x self | Heading date               |             | 2                     | 4             | 0.50  |        | 31   |
| Plant   | <i>Oryza sativa x O. rufipogon</i> | Inter | Outcross x self | Days to heading            |             | 2                     | 7             | 0.29  | 0.4531 | 32   |
| Plant   | <i>Oryza sativa x O. rufipogon</i> | Inter | Outcross x self | Days to maturity           |             | 2                     | 8             | 0.25  | 0.2270 | 32   |
| Plant   | <i>Oryza sativa x O. rufipogon</i> | Inter | Outcross x self | Plant height               |             | 0                     | 6             | 0.00  | 0.0238 | 32   |
| Plant   | <i>Oryza sativa x O. rufipogon</i> | Inter | Outcross x self | Panicle length             |             | 0                     | 7             | 0.00  | 0.0156 | 32   |
| Plant   | <i>Oryza sativa x O. rufipogon</i> | Inter | Outcross x self | Panicles/plant             |             | 0                     | 2             | 0.00  |        | 32   |
| Plant   | <i>Oryza sativa x O. rufipogon</i> | Inter | Outcross x self | Spikelets/panicle          |             | 1                     | 4             | 0.25  |        | 32   |
| Plant   | <i>Oryza sativa x O. rufipogon</i> | Inter | Outcross x self | Spikelets/plant            |             | 0                     | 1             | 0.00  |        | 32   |
| Plant   | <i>Oryza sativa x O. rufipogon</i> | Inter | Outcross x self | Grains/panicle             | D           | 2                     | 5             | 0.40  |        | 32   |
| Plant   | <i>Oryza sativa x O. rufipogon</i> | Inter | Outcross x self | Grains/plant               | D           | 3                     | 6             | 0.50  | 1.0000 | 32   |
| Plant   | <i>Oryza sativa x O. rufipogon</i> | Inter | Outcross x self | % seed set                 |             | 2                     | 7             | 0.29  | 0.4531 | 32   |
| Plant   | <i>Oryza sativa x O. rufipogon</i> | Inter | Outcross x self | 1.000 grain weight         | D           | 3                     | 8             | 0.38  | 0.5706 | 32   |
| Plant   | <i>Oryza sativa x O. rufipogon</i> | Inter | Outcross x self | Grain yield                | D           | 3                     | 7             | 0.43  | 1.0000 | 32   |
| Plant   | <i>Oryza sativa x O. rufipogon</i> | Inter | Outcross x self | Days to heading            |             | 1                     | 4             | 0.25  |        | 33   |
| Plant   | <i>Oryza sativa x O. rufipogon</i> | Inter | Outcross x self | Plant height               |             | 1                     | 8             | 0.13  | 0.0552 | 33   |
| Plant   | <i>Oryza sativa x O. rufipogon</i> | Inter | Outcross x self | Panicles/plant             |             | 0                     | 1             | 0.00  |        | 33   |
| Plant   | <i>Oryza sativa x O. rufipogon</i> | Inter | Outcross x self | Percentage of sterility    |             | 0                     | 2             | 0.00  |        | 33   |
| Plant   | <i>Oryza sativa x O. rufipogon</i> | Inter | Outcross x self | Grains/Plant               | D           | 0                     | 4             | 0.00  |        | 33   |
| Plant   | <i>Oryza sativa x O. rufipogon</i> | Inter | Outcross x self | 100 grain weight           | D           | 0                     | 5             | 0.00  |        | 33   |
| Plant   | <i>Oryza sativa x O. rufipogon</i> | Inter | Outcross x self | yield/Plant                | D           | 0                     | 2             | 0.00  |        | 33   |
| Plant   | <i>Oryza sativa x O. rufipogon</i> | Inter | Outcross x self | Seed shattering            | D           | 0                     | 4             | 0.00  |        | 34   |

| Kingdom | Species                                          | Cross | Mating system   | Trait                                              | Dom. (D) | No. antag. QTLs | Total QTLs | Ratio | P      | Ref. |
|---------|--------------------------------------------------|-------|-----------------|----------------------------------------------------|----------|-----------------|------------|-------|--------|------|
| Plant   | <i>Oryza sativa</i> x <i>O. rufipogon</i>        | Inter | Outcross x self | Seed dormancy, intact, 30 days after heading (DAH) | D        | 0               | 12         | 0.00  | 0.0004 | 34   |
| Plant   | <i>Oryza sativa</i> x <i>O. rufipogon</i>        | Inter | Outcross x self | Seed dormancy, dehulled, 30 DAH                    | D        | 0               | 2          | 0.00  |        | 34   |
| Plant   | <i>Oryza sativa</i> x <i>O. rufipogon</i>        | Inter | Outcross x self | Seed dormancy, intact, 60 DAH                      | D        | 0               | 6          | 0.00  | 0.0238 | 34   |
| Plant   | <i>Oryza sativa</i> x <i>O. rufipogon</i>        | Inter | Outcross x self | Seed dormancy, dehulled, 60 DAH                    | D        | 0               | 5          | 0.00  |        | 34   |
| Plant   | <i>Pennisetum glaucum</i>                        | Intra | Outcross x self | Plant height                                       |          | 1               | 2          | 0.50  |        | 35   |
| Plant   | <i>Pennisetum glaucum</i>                        | Intra | Outcross x self | Height of the primary tiller                       |          | 0               | 2          | 0.00  |        | 35   |
| Plant   | <i>Pennisetum glaucum</i>                        | Intra | Outcross x self | No. of nodes on the primary tiller                 |          | 1               | 2          | 0.50  |        | 35   |
| Plant   | <i>Pennisetum glaucum</i>                        | Intra | Outcross x self | Total no. of spikes/plant                          |          | 1               | 4          | 0.25  |        | 35   |
| Plant   | <i>Pennisetum glaucum</i>                        | Intra | Outcross x self | No. of basal tillers                               |          | 0               | 3          | 0.00  |        | 35   |
| Plant   | <i>Pennisetum glaucum</i>                        | Intra | Outcross x self | Width of the 4th leaf at maturity                  |          | 0               | 4          | 0.00  |        | 35   |
| Plant   | <i>Pennisetum glaucum</i>                        | Intra | Outcross x self | Plant height at first heading date                 |          | 0               | 2          | 0.00  |        | 35   |
| Plant   | <i>Pennisetum glaucum</i>                        | Intra | Outcross x self | Days to heading                                    |          | 1               | 2          | 0.50  |        | 35   |
| Plant   | <i>Pennisetum glaucum</i>                        | Intra | Outcross x self | Beginning female flowering (BFF)                   |          | 2               | 4          | 0.50  |        | 35   |
| Plant   | <i>Pennisetum glaucum</i>                        | Intra | Outcross x self | DAH - days to heading                              |          | 0               | 2          | 0.00  |        | 35   |
| Plant   | <i>Pennisetum glaucum</i>                        | Intra | Outcross x self | Weight of the spike                                | D        | 0               | 3          | 0.00  |        | 35   |
| Plant   | <i>Pennisetum glaucum</i>                        | Intra | Outcross x self | Length of the spike                                | D        | 1               | 3          | 0.33  |        | 35   |
| Plant   | <i>Pennisetum glaucum</i>                        | Intra | Outcross x self | Width of the spike                                 | D        | 1               | 2          | 0.50  |        | 35   |
| Plant   | <i>Pennisetum glaucum</i>                        | Intra | Outcross x self | Pedicel length                                     |          | 1               | 2          | 0.50  |        | 35   |
| Plant   | <i>Pennisetum glaucum</i>                        | Intra | Outcross x self | Length of the involucre bristles                   |          | 1               | 2          | 0.50  |        | 35   |
| Plant   | <i>Pennisetum glaucum</i>                        | Intra | Outcross x self | Length of the upper floret lemma                   |          | 1               | 3          | 0.33  |        | 35   |
| Plant   | <i>Solanum tuberosum</i> x <i>S. berthaultii</i> | Inter | Outcross x self | Tuber dormancy                                     | D        | 0               | 5          | 0.00  |        | 36   |
| Plant   | <i>Solanum tuberosum</i>                         | Intra | Outcross x self | Tuber dormancy                                     | D        | 2               | 4          | 0.50  |        | 36   |
| Plant   | <i>Solanum tuberosum</i> x <i>S. berthaultii</i> | Inter | Outcross x self | Tuber dormancy                                     | D        | 0               | 5          | 0.00  | 0.1250 | 36   |
| Plant   | <i>Solanum tuberosum</i> x <i>S. berthau</i>     | Inter | Outcross x self | Tuberization                                       | D        | 3               | 11         | 0.27  | 0.2268 | 37   |
| Plant   | <i>Solanum tuberosum</i>                         | Intra | Outcross x self | Tuberization                                       | D        | 4               | 10         | 0.40  | 0.6060 | 37   |
| Plant   | <i>Solanum tuberosum</i> x <i>S. berthau</i>     | Inter | Outcross x self | Tuber ABA content                                  |          | 1               | 3          | 0.33  |        | 38   |
| Plant   | <i>Solanum tuberosum</i> x <i>S. berthau</i>     | Inter | Outcross x self | Solasodine content                                 |          | 1               | 3          | 0.33  |        | 39   |
| Plant   | <i>Solanum tuberosum</i> x <i>S. berthau</i>     | Inter | Outcross x self | Solanodine content                                 |          | 0               | 2          | 0.00  |        | 39   |
| Plant   | <i>Sorghum bicolor</i> x <i>S. propinquum</i>    | Inter | Self            | Aboveground rhizome number                         |          | 0               | 4          | 0.00  |        | 40   |
| Plant   | <i>Sorghum bicolor</i> x <i>S. propinquum</i>    | Inter | Self            | Subterranean rhizomatousness                       |          | 2               | 10         | 0.20  | 0.0879 | 40   |
| Plant   | <i>Sorghum bicolor</i> x <i>S. propinquum</i>    | Inter | Self            | Rhizome growth                                     |          | 0               | 1          | 0.00  |        | 40   |
| Plant   | <i>Sorghum bicolor</i> x <i>S. propinquum</i>    | Inter | Self            | Seedling tillers                                   |          | 0               | 4          | 0.00  |        | 40   |
| Plant   | <i>Sorghum bicolor</i> x <i>S. propinquum</i>    | Inter | Self            | Regrowth                                           |          | 1               | 7          | 0.14  | 0.1250 | 40   |
| Plant   | <i>Triticum durum</i>                            | Intra | Self            | Protein content – env. 1                           | D        | 0               | 9          | 0.00  | 0.0039 | 41   |
| Plant   | <i>Triticum durum</i>                            | Intra | Self            | Protein content – env. 2                           | D        | 0               | 13         | 0.00  | 0.0002 | 41   |
| Plant   | <i>Triticum durum</i>                            | Intra | Self            | Protein content – env. 3                           | D        | 0               | 11         | 0.00  | 0.0010 | 41   |
| Plant   | <i>Triticum durum</i>                            | Intra | Self            | Grain yield/Plant – env. 1                         | D        | 0               | 1          | 0.00  |        | 41   |
| Plant   | <i>Triticum durum</i>                            | Intra | Self            | Grain yield/Plant – env. 2                         | D        | 0               | 7          | 0.00  | 0.0156 | 41   |
| Plant   | <i>Triticum durum</i>                            | Intra | Self            | Grain yield/Plant – env. 3                         | D        | 0               | 8          | 0.00  | 0.0061 | 41   |
| Plant   | <i>Triticum durum</i>                            | Intra | Self            | Low grain weight – env. 1                          | D        | 0               | 3          | 0.00  |        | 41   |
| Plant   | <i>Triticum durum</i>                            | Intra | Self            | Low grain weight – env. 2                          | D        | 0               | 7          | 0.00  | 0.0156 | 41   |
| Plant   | <i>Triticum durum</i>                            | Intra | Self            | Low grain weight – env. 3                          | D        | 0               | 7          | 0.00  | 0.0156 | 41   |

| Kingdom | Species         | Cross | Mating system   | Trait                                          | Dom. (D) | No. antag. QTLs | Total QTLs | Ratio | P      | Ref. |
|---------|-----------------|-------|-----------------|------------------------------------------------|----------|-----------------|------------|-------|--------|------|
| Plant   | <i>Zea mays</i> | Intra | Outcross x self | Cupules/rank                                   | D        | 0               | 5          | 0.00  |        | 42   |
| Plant   | <i>Zea mays</i> | Intra | Outcross x self | Disarticulation (shattering)                   | D        | 0               | 4          | 0.00  |        | 42   |
| Plant   | <i>Zea mays</i> | Intra | Outcross x self | Glume hardness                                 | D        | 0               | 5          | 0.00  |        | 42   |
| Plant   | <i>Zea mays</i> | Intra | Outcross x self | Internode length on primary lateral branch     |          | 1               | 5          | 0.20  |        | 42   |
| Plant   | <i>Zea mays</i> | Intra | Outcross x self | Leaf length                                    |          | 0               | 5          | 0.00  |        | 42   |
| Plant   | <i>Zea mays</i> | Intra | Outcross x self | Branch number in primary lateral inflorescence |          | 2               | 5          | 0.40  |        | 42   |
| Plant   | <i>Zea mays</i> | Intra | Outcross x self | Plant height                                   |          | 1               | 6          | 0.17  | 0.1667 | 42   |
| Plant   | <i>Zea mays</i> | Intra | Outcross x self | % cupules lacking pedicellate spikelet         |          | 3               | 6          | 0.50  | 1.0000 | 42   |
| Plant   | <i>Zea mays</i> | Intra | Outcross x self | No. of ears on lateral branch                  |          | 1               | 3          | 0.33  |        | 42   |
| Plant   | <i>Zea mays</i> | Intra | Outcross x self | No. of rows of cupules                         | D        | 0               | 6          | 0.00  | 0.0238 | 42   |
| Plant   | <i>Zea mays</i> | Intra | Outcross x self | % male spikelets/ inflorescence                |          | 1               | 5          | 0.20  |        | 42   |
| Plant   | <i>Zea mays</i> | Intra | Outcross x self | No. of tillers                                 |          | 0               | 1          | 0.00  |        | 42   |

Studies and/or traits are categorized by kingdom, cross type, mating system, and whether or not the trait difference results from domestication. The number of antagonistic QTLs, the total number of QTLs detected, the proportion of QTLs with antagonistic or opposing effects are given for each trait. For those traits with greater than six detected QTLs, the probability that the observed ratio results from neutral divergence is also provided.

- Hunt, G. J., Collins A. M., Rivera R., Page R. E. & Guzman-Novoa, E. (1999) *J. Hered.* **90**, 585-589.
- Page, R. E., Fondrk, M. K., Hunt, G. J., Guzman-Novoa, E., Humphries, M. A., Nguyen, K. & Greene, A. S. (2000) *J. Hered.* **91**, 474-479.
- Hunt, G. J., Guzman-Novoa, E., Fondrk, M. K. & Page, R. E. (1998) *Genetics* **148**, 1203-1213.
- Knott, S. A., Marklund, L., Haley, C. S., Andersson, K., Davies, W., Ellegren, H., Fredholm, M., Hansson, I., Hoyheim, B., Lundstrom, K., Moller, M. & Andersson, L. (1998) *Genetics* **149**, 1069-1080.
- Andersson-Eklund, L., Uhlhorn, H., Lundeheim, N., Dalin, G. & Andersson, L. (2000) *Gene Res.* **75**, 223-230.
- Bailey, M. A., Mian, M. A. R., Carter, T. E., Ashley, D. A. & Boerma, H. R. (1997) *J. Hered.* **88**, 152-154.
- Jiang, C., Wright, R. J., Woo, S. S., DelMonte, T. A. & Paterson, A. H. (2000) *Theor. Appl. Genet.* **100**, 409-418.
- Burke, J. M., Tang S., Knapp S. J. & Riieseberg, L. H. (2002) *Genetics* **161**:1257-1267.
- Kim, S. C. & Riieseberg, L. H. (1999) *Genetics* **153**, 965-977.
- Johnson, W. C., Jackson, L. E., Ochoa, O., van Wijk, R., Peleman, J., St Clair, D. A. & Michelmore, R.W. (2000) *Theor. Appl. Genet.* **101**, 1066-1073.
- Goldman, I. L., Paran, I. & Zamir, (1995) *D. Theor. Appl. Genet.* **90**, 925-932.
- Paran, I., Goldman, I. & Zamir, D. (1997) *Genome* **40**, 242-248.
- Paterson, A. H., Damon, S., Hewitt, J. D., Zamir, D., Rabinowitch, H. D., Lincoln, S. E., Lander, E. S. & Tanksley, S. D. (1991) *Genetics* **127**, 181-197.
- Paterson, A. H., Lander, E. S., Hewitt, J. D., Peterson, S., Lincoln, S. E. & Tanksley, S. D. (1988) *Nature (London)* **335**, 721-726.
- Truco, M. J., Randall, L. B., Bloom, A. J. & St. Clair, D. A. (2000) *Theor. Appl. Genet.* **101**, 1082-1092.
- Bernacchi, D. & Tanksley, S. D. (1997) *Genetics* **147**, 861-877.
- Bernacchi, D., Beck-Bunn, T., Eshed, Y., Lopez, J., Petiard, V., Uhlig, J., Zamir, D. & Tanksley, S. (1998) *Theor. Appl. Genet.* **97**, 381-397.
- Fulton, T. M., Grandillo, S., Beck-Bunn, T., Fridman, E., Frampton, A., Lopez, J., Petiard, V., Uhlig, J., Zamir, D. & Tanksley, S. D. (2000) *Theor. Appl. Genet.* **100**, 1025-1042.
- Fulton, T. M., Beck-Bunn, T., Emmatty, D., Eshed, Y., Lopez, J., Petiard, V., Uhlig, J., Zamir, D. & Tanksley, S. D. (1997) *Theor. Appl. Genet.* **95**, 881-894.
- Mutschler, M. A., Doerge, R. W., Liu, S. C., Kuai, J. P., Liedl, B. E. & Shapiro, J. A. (1996) *Theor. Appl. Genet.* **92**, 709-718.
- de Vicente, M. C. & Tanksley, S. D. (1993) *Genetics* **134**, 585-596.
- Tanksley, S. D., Grandillo, S., Fulton, T. M., Zamir, D., Eshed, Y., Petiard, V., Lopez, J. & Beckbunn, T. (1996) *Theor. Appl. Genet.* **92**, 213-224.
- Lippman, Z. & Tanksley, S. D. (2001) *Genetics* **158**, 413-422.
- Grandillo, S. & Tanksley, S. D. (1996) *Theor. Appl. Genet.* **92**, 935-951.
- van der Knaap, Z., Lippman, B. & Tanksley, S. D. (2002) *Theor. Appl. Genet.* **104**, 241-247.

26. Foolad, M. R., Chen, F. Q. & Lin, G. Y. (1998) *Theor. Appl. Genet.* **97**, 1133-1144.
27. Foolad, M. R. Lin, G. Y. & Chen, F. Q. (1999) *Plant Breed.* **118**, 167-173.
28. Blauth, S. L., Churchill, G. A. & Mutschler, M. A. (1998) *Theor. Appl. Genet.* **96**, 458-467.
29. Doganlar S., Frary, A. & Tanksley, S. D. (2000) *Theor. Appl. Genet.* **100**, 1267-1273.
30. Bres-Patry, C., Lorieux, M., Clement, G., Bangratz, M. & Ghesquiere, A. (2001) *Theor. Appl. Genet.* **102**, 118-126.
31. Xiong, L. Z., Liu, K. D., Dai, X. K., Xu, C. G. & Zhang, Q. (1999) *Theor. Appl. Genet.* **98**, 243-251.
32. Xiao, J., Jiming, L., Grandillo, S., Ahn, S. N., Yuan, L., Tanksley, S. D. & McCouch, S. R. (1998) *Genetics* **150**, 899-909.
33. Moncada P., Martinez, C. P., Borrero, J., Chatel, M., Gauch, H., Guimaraes, E., Tohme, J. & McCouch, S. R. (2001) *Theor. Appl. Genet.* **102**, 41-52.
34. Cai, H. W. & Morishima, H. (2000) *Theor. Appl. Genet.* **100**, 840-846.
35. Poncet, V., Lamy, F., Devos, K. M., Gale, M. D., Sarr, A. & Robert, T. (2000) *Theor. Appl. Genet.* **100**, 147-159.
36. vandenBerg, J. H., Ewing, E. E., Plaisted, R. L., McMurry, S. & Bonierbale, M. W. (1996) *Theor. Appl. Genet.* **93**, 317-324.
37. vandenBerg, J. H., Ewing, E. E., Plaisted, R. L., McMurry, S. & Bonierbale, M. W. (1996) *Theor. Appl. Genet.* **93**, 307-316.
38. Simko, I., McMurry, S., Yang, H. M., Manschot, A., Davies, P. J. & Ewing, E. E. (1997) *Plant Physiol.* **115**, 1453-1459.
39. Yench, G. C., Kowalski, S. P., Kobayashi, R. S., Sinden, S. L., Bonierbale, M. W. & Deahl, K. L. (1998) *Theor. Appl. Genet.* **97**, 563-574.
40. Paterson, A. H., Schertz, K. F., Lin, Y. R., Liu, S. C. & Chang, Y. L. (1995) *Proc. Natl. Acad. Sci. USA* **92**, 6127-6131.
41. Blanco, A., deGiovanni, C., Laddomada, B., Sciancalepore, A., Simeone, R., Devos, K. M. & Gale, M. D. (1996) *Plant Breed.* **115**, 310-316.
42. Doebley, J. & Stec, A. (1991) *Genetics* **129**, 285-295.
