# Supplementary material
Source: PubMed Central journal article supplement (PMC129429)
Supplement: pnas_192360899_2.pdf [file pnas_192360899_2.pdf]

**Table 5. Direction of effects of QTL for crosses involving natural populations of animals and plants**

| Kingdom | Species                         | Cross | Mating system | Trait                                      | Trait type   | Timing (T) | No. antag. QTLs | Total QTLs | Ratio | P      | Ref. |
|---------|---------------------------------|-------|---------------|--------------------------------------------|--------------|------------|-----------------|------------|-------|--------|------|
| Animal  | <i>Acyrtosiphon pisum pisum</i> | Intra | Outcross      | Alfalfa race - fecundity on alfalfa        | Life history |            | 0               | 4          | 0.00  |        | 1    |
| Animal  | <i>Acyrtosiphon pisum pisum</i> | Intra | Outcross      | Alfalfa race - fecundity on clover         | Life history |            | 0               | 4          | 0.00  |        | 1    |
| Animal  | <i>Acyrtosiphon pisum pisum</i> | Intra | Outcross      | Alfalfa race - acceptance of alfalfa       | Life history |            | 0               | 5          | 0.00  |        | 1    |
| Animal  | <i>Acyrtosiphon pisum pisum</i> | Intra | Outcross      | Clover race - fecundity on alfalfa         | Life history |            | 0               | 1          | 0.00  |        | 1    |
| Animal  | <i>Acyrtosiphon pisum pisum</i> | Intra | Outcross      | Clover race - fecundity on clover          | Life history |            | 0               | 3          | 0.00  |        | 1    |
| Animal  | <i>Acyrtosiphon pisum pisum</i> | Intra | Outcross      | Clover race - acceptance of alfalfa        | Life history |            | 0               | 3          | 0.00  |        | 1    |
| Animal  | <i>Acyrtosiphon pisum pisum</i> | Intra | Outcross      | Clover race - acceptance of clover         | Life history |            | 0               | 1          | 0.00  |        | 1    |
| Animal  | <i>Caenorhabditis elegans</i>   | Intra | Self          | Body length                                | Morphology   |            | 1               | 2          | 0.50  |        | 2    |
| Animal  | <i>Caenorhabditis elegans</i>   | Intra | Self          | Fertility                                  | Life history |            | 0               | 3          | 0.00  |        | 2    |
| Animal  | <i>Caenorhabditis elegans</i>   | Intra | Self          | Mean lifespan                              | Life history | T          | 0               | 1          | 0.00  |        | 3    |
| Animal  | <i>Caenorhabditis elegans</i>   | Intra | Self          | Total fertility                            | Life history |            | 0               | 2          | 0.00  |        | 3    |
| Animal  | <i>Caenorhabditis elegans</i>   | Intra | Self          | Early fertility fraction                   | Life history |            | 0               | 1          | 0.00  |        | 3    |
| Animal  | <i>Caenorhabditis elegans</i>   | Intra | Self          | Population growth                          | Life history |            | 1               | 4          | 0.25  |        | 3    |
| Animal  | <i>Caenorhabditis elegans</i>   | Intra | Self          | Time of onset of egg laying                | Life history | T          | 1               | 3          | 0.33  |        | 3    |
| Animal  | <i>Drosophila melanogaster</i>  | Intra | Outcross      | Reproductive success                       | Life history |            | 0               | 2          | 0.00  |        | 4    |
| Animal  | <i>Drosophila melanogaster</i>  | Intra | Outcross      | Ovariole number                            | Life history |            | 0               | 2          | 0.00  |        | 4    |
| Animal  | <i>Drosophila melanogaster</i>  | Intra | Outcross      | Cuticular hydrocarbons                     | Physiology   |            | 0               | 1          | 0.00  |        | 5    |
| Animal  | <i>Drosophila melanogaster</i>  | Intra | Outcross      | Cuticular hydrocarbons                     | Physiology   |            | 0               | 1          | 0.00  |        | 5    |
| Animal  | <i>Drosophila melanogaster</i>  | Intra | Outcross      | Sex comb tooth number                      | Morphology   |            | 1               | 2          | 0.50  |        | 6    |
| Animal  | <i>Drosophila melanogaster</i>  | Intra | Outcross      | Lifespan male                              | Life history | T          | 2               | 5          | 0.40  |        | 7    |
| Animal  | <i>Drosophila melanogaster</i>  | Intra | Outcross      | Lifespan female                            | Life history | T          | 2               | 5          | 0.40  |        | 7    |
| Animal  | <i>Drosophila melanogaster</i>  | Intra | Outcross      | Male, sternopleural bristle number, 18°C   | Morphology   |            | 2               | 5          | 0.40  |        | 8    |
| Animal  | <i>Drosophila melanogaster</i>  | Intra | Outcross      | Male, sternopleural bristle number, 25°C   | Morphology   |            | 1               | 5          | 0.20  |        | 8    |
| Animal  | <i>Drosophila melanogaster</i>  | Intra | Outcross      | Male, sternopleural bristle number, 29°C   | Morphology   |            | 1               | 4          | 0.25  |        | 8    |
| Animal  | <i>Drosophila melanogaster</i>  | Intra | Outcross      | Female, sternopleural bristle number, 18°C | Morphology   |            | 2               | 5          | 0.40  |        | 8    |
| Animal  | <i>Drosophila melanogaster</i>  | Intra | Outcross      | Female, sternopleural bristle number, 25°C | Morphology   |            | 1               | 4          | 0.25  |        | 8    |
| Animal  | <i>Drosophila melanogaster</i>  | Intra | Outcross      | Female, sternopleural bristle number, 29°C | Morphology   |            | 2               | 6          | 0.33  | 0.5238 | 8    |
| Animal  | <i>Drosophila melanogaster</i>  | Intra | Outcross      | Male, abdominal bristle number, 18°C       | Morphology   |            | 1               | 4          | 0.25  |        | 8    |
| Animal  | <i>Drosophila melanogaster</i>  | Intra | Outcross      | Male, abdominal bristle number, 25°C       | Morphology   |            | 3               | 6          | 0.50  | 1.0000 | 8    |
| Animal  | <i>Drosophila melanogaster</i>  | Intra | Outcross      | Male, abdominal bristle number, 29°C       | Morphology   |            | 3               | 6          | 0.50  | 1.0000 | 8    |
| Animal  | <i>Drosophila melanogaster</i>  | Intra | Outcross      | Female, abdominal bristle number, 18°C     | Morphology   |            | 3               | 6          | 0.50  | 1.0000 | 8    |
| Animal  | <i>Drosophila melanogaster</i>  | Intra | Outcross      | Female, abdominal bristle number, 25°C     | Morphology   |            | 2               | 5          | 0.40  |        | 8    |
| Animal  | <i>Drosophila melanogaster</i>  | Intra | Outcross      | Female, abdominal bristle number, 29°C     | Morphology   |            | 2               | 6          | 0.33  | 0.5238 | 8    |
| Animal  | <i>Drosophila melanogaster</i>  | Intra | Outcross      | Male lifespan                              | Life history | T          | 10              | 23         | 0.43  | 0.6776 | 9    |
| Animal  | <i>Drosophila melanogaster</i>  | Intra | Outcross      | Female lifespan                            | Life history | T          | 4               | 23         | 0.17  | 0.0018 | 9    |
| Animal  | <i>Drosophila melanogaster</i>  | Intra | Outcross      | Male lifespan/low density                  | Life history | T          | 1               | 3          | 0.33  |        | 10   |

| Kingdom | Species                                                                     | Cross | Mating system | Trait                                      | Trait type   | Timing (T) | No. antag. QTLs | Total QTLs | Ratio | P      | Ref. |
|---------|-----------------------------------------------------------------------------|-------|---------------|--------------------------------------------|--------------|------------|-----------------|------------|-------|--------|------|
| Animal  | <i>Drosophila melanogaster</i>                                              | Intra | Outcross      | Female lifespan/low density                | Life history | T          | 1               | 3          | 0.33  |        | 10   |
| Animal  | <i>Drosophila melanogaster</i>                                              | Intra | Outcross      | Male lifespan/high density                 | Life history | T          | 0               | 2          | 0.00  |        | 10   |
| Animal  | <i>Drosophila melanogaster</i>                                              | Intra | Outcross      | Female lifespan/high density               | Life history | T          | 0               | 1          | 0.00  |        | 10   |
| Animal  | <i>Drosophila melanogaster</i>                                              | Intra | Outcross      | Hind grooming                              | Behavior     |            | 0               | 2          | 0.00  |        | 11   |
| Animal  | <i>Drosophila melanogaster</i>                                              | Intra | Outcross      | Quivering                                  | Behavior     |            | 1               | 2          | 0.50  |        | 11   |
| Animal  | <i>Drosophila melanogaster</i>                                              | Intra | Outcross      | Grasping                                   | Behavior     |            | 1               | 2          | 0.50  |        | 11   |
| Animal  | <i>Drosophila melanogaster</i>                                              | Intra | Outcross      | Self-righting                              | Behavior     |            | 0               | 2          | 0.00  |        | 11   |
| Animal  | <i>Drosophila sechellia</i>                                                 | Intra | Outcross      | Toxin resistance                           | Physiology   |            | 0               | 5          | 0.00  |        | 12   |
| Animal  | <i>Drosophila sechellia</i> x <i>D. simulans</i> and <i>D. melanogaster</i> | Inter | Outcross      | Larval hairs                               | Morphology   |            | 0               | 1          | 0.00  |        | 13   |
| Animal  | <i>Drosophila simulans</i> x <i>D. mauritiana</i>                           | Inter | Outcross      | Posterior lobe                             | Morphology   |            | 1               | 19         | 0.05  | 0.0001 | 14   |
| Animal  | <i>Drosophila simulans</i> x <i>D. mauritiana</i>                           | Inter | Outcross      | Anal plate bristle number                  | Morphology   |            | 2               | 6          | 0.33  | 0.5238 | 15   |
| Animal  | <i>Drosophila simulans</i> x <i>D. mauritiana</i>                           | Inter | Outcross      | Clasper bristle number                     | Morphology   |            | 0               | 1          | 0.00  |        | 15   |
| Animal  | <i>Drosophila simulans</i> x <i>D. mauritiana</i>                           | Inter | Outcross      | Sex comb tooth number                      | Morphology   |            | 1               | 2          | 0.50  |        | 15   |
| Animal  | <i>Drosophila simulans</i> x <i>D. mauritiana</i>                           | Inter | Outcross      | Fifth sternite bristle number              | Morphology   |            | 0               | 1          | 0.00  |        | 15   |
| Animal  | <i>Drosophila simulans</i> x <i>D. mauritiana</i>                           | Inter | Outcross      | Anal plate area                            | Morphology   |            | 0               | 3          | 0.00  |        | 15   |
| Animal  | <i>Drosophila simulans</i> x <i>D. mauritiana</i>                           | Inter | Outcross      | Posterior lobe area                        | Morphology   |            | 0               | 8          | 0.00  | 0.0061 | 15   |
| Animal  | <i>Drosophila simulans</i> x <i>D. sechellia</i>                            | Inter | Outcross      | Posterior lobe area, <i>sim</i> BC         | Morphology   |            | 2               | 11         | 0.18  | 0.0654 | 16   |
| Animal  | <i>Drosophila simulans</i> x <i>D. sechellia</i>                            | Inter | Outcross      | Posterior lobe area, adjPC1, <i>sim</i> BC | Morphology   |            | 2               | 9          | 0.22  | 0.1797 | 16   |
| Animal  | <i>Drosophila simulans</i> x <i>D. sechellia</i>                            | Inter | Outcross      | Sex comb tooth, <i>sim</i> BC              | Morphology   |            | 1               | 4          | 0.25  |        | 16   |
| Animal  | <i>Drosophila simulans</i> x <i>D. sechellia</i>                            | Inter | Outcross      | Testis length, <i>sim</i> BC               | Morphology   |            | 1               | 7          | 0.14  | 0.1250 | 16   |
| Animal  | <i>Drosophila simulans</i> x <i>D. sechellia</i>                            | Inter | Outcross      | Cyst length, <i>sim</i> BC                 | Morphology   |            | 0               | 3          | 0.00  |        | 16   |
| Animal  | <i>Drosophila simulans</i> x <i>D. sechellia</i>                            | Inter | Outcross      | Tibia length, <i>sim</i> BC                | Morphology   |            | 1               | 5          | 0.20  |        | 16   |
| Animal  | <i>Drosophila simulans</i> x <i>D. sechellia</i>                            | Inter | Outcross      | Posterior lobe area, <i>sim</i> BC         | Morphology   |            | 0               | 11         | 0.00  | 0.0010 | 16   |
| Animal  | <i>Drosophila simulans</i> x <i>D. sechellia</i>                            | Inter | Outcross      | Posterior lobe area, adjPC1, <i>sec</i> BC | Morphology   |            | 4               | 9          | 0.44  | 1.0000 | 16   |
| Animal  | <i>Drosophila simulans</i> x <i>D. sechellia</i>                            | Inter | Outcross      | Sex comb tooth number, <i>sec</i> BC       | Morphology   |            | 0               | 4          | 0.00  |        | 16   |
| Animal  | <i>Drosophila simulans</i> x <i>D. sechellia</i>                            | Inter | Outcross      | Testis length, <i>sec</i> BC               | Morphology   |            | 3               | 7          | 0.43  | 1.0000 | 16   |
| Animal  | <i>Drosophila simulans</i> x <i>D. sechellia</i>                            | Inter | Outcross      | Cyst length, <i>sec</i> BC                 | Morphology   |            | 0               | 3          | 0.00  |        | 16   |
| Animal  | <i>Drosophila simulans</i> x <i>D. sechellia</i>                            | Inter | Outcross      | Tibia length, <i>sec</i> BC                | Morphology   |            | 2               | 5          | 0.40  |        | 16   |
| Animal  | <i>Gasterosteus aculeatus</i> (limnetic x benthic species)                  | Inter | Outcross      | Gill raker number                          | Morphology   |            | 0               | 2          | 0.00  |        | 17   |
| Animal  | <i>Gasterosteus aculeatus</i> (limnetic x benthic species)                  | Inter | Outcross      | Lateral plate number                       | Morphology   |            | 0               | 2          | 0.00  |        | 17   |
| Animal  | <i>Gasterosteus aculeatus</i> (limnetic x benthic species)                  | Inter | Outcross      | Dorsal spine, 1 length                     | Morphology   |            | 0               | 2          | 0.00  |        | 17   |
| Animal  | <i>Gasterosteus aculeatus</i> (limnetic x benthic species)                  | Inter | Outcross      | Dorsal spine, 2 length                     | Morphology   |            | 0               | 2          | 0.00  |        | 17   |
| Animal  | <i>Gasterosteus aculeatus</i> (limnetic x benthic species)                  | Inter | Outcross      | Pelvic spine length                        | Morphology   |            | 0               | 1          | 0.00  |        | 17   |

| Kingdom | Species                     | Cross | Mating system | Trait                                 | Trait type   | Timing (T) | No. antag. QTLs | Total QTLs | Ratio | P      | Ref. |
|---------|-----------------------------|-------|---------------|---------------------------------------|--------------|------------|-----------------|------------|-------|--------|------|
|         | benthic species)            |       |               |                                       |              |            |                 |            |       |        |      |
| Animal  | <i>Mus musculus</i>         | Intra | Outcross      | Body weight                           | Morphology   |            | 5               | 11         | 0.45  | 1.0000 | 18   |
| Animal  | <i>Mus musculus</i>         | Intra | Outcross      | Aggressive behavior                   | Behavior     |            | 0               | 2          | 0.00  |        | 19   |
| Animal  | <i>Oncorhynchus mykiss</i>  | Intra | Outcross      | Time to hatch                         | Life history | T          | 0               | 3          | 0.00  |        | 20   |
| Animal  | <i>Oncorhynchus mykiss</i>  | Intra | Outcross      | Embryonic length                      | Morphology   |            | 0               | 2          | 0.00  |        | 20   |
| Animal  | <i>Oncorhynchus mykiss</i>  | Intra | Outcross      | Weight at swim-up                     | Morphology   |            | 1               | 2          | 0.50  |        | 20   |
| Plant   | <i>Arabidopsis thaliana</i> | Intra | Self          | Hypocotyl length: white light         | Morphology   |            | 1               | 4          | 0.25  |        | 21   |
| Plant   | <i>Arabidopsis thaliana</i> | Intra | Self          | Hypocotyl length: red light           | Morphology   |            | 2               | 4          | 0.50  |        | 21   |
| Plant   | <i>Arabidopsis thaliana</i> | Intra | Self          | Hypocotyl length: blue light          | Morphology   |            | 1               | 4          | 0.25  |        | 21   |
| Plant   | <i>Arabidopsis thaliana</i> | Intra | Self          | Hypocotyl length: far-red light       | Morphology   |            | 1               | 5          | 0.20  |        | 21   |
| Plant   | <i>Arabidopsis thaliana</i> | Intra | Self          | Hypocotyl length: white light + GA    | Morphology   |            | 1               | 3          | 0.33  |        | 21   |
| Plant   | <i>Arabidopsis thaliana</i> | Intra | Self          | Hypocotyl length: dark + brassinazole | Morphology   |            | 1               | 3          | 0.33  |        | 21   |
| Plant   | <i>Arabidopsis thaliana</i> | Intra | Self          | Total leaf number                     | Morphology   |            | 2               | 4          | 0.50  |        | 22   |
| Plant   | <i>Arabidopsis thaliana</i> | Intra | Self          | Largest leaf length                   | Morphology   |            | 3               | 7          | 0.43  | 1.0000 | 22   |
| Plant   | <i>Arabidopsis thaliana</i> | Intra | Self          | Plant height                          | Morphology   |            | 2               | 4          | 0.50  |        | 22   |
| Plant   | <i>Arabidopsis thaliana</i> | Intra | Self          | Side shoot number                     | Morphology   |            | 2               | 4          | 0.50  |        | 22   |
| Plant   | <i>Arabidopsis thaliana</i> | Intra | Self          | Flowering time                        | Life history | T          | 0               | 5          | 0.00  |        | 23   |
| Plant   | <i>Arabidopsis thaliana</i> | Intra | Self          | Days to first flower                  | Life history | T          | 0               | 2          | 0.00  |        | 24   |
| Plant   | <i>Arabidopsis thaliana</i> | Intra | Self          | Leaf length at flowering              | Morphology   |            | 0               | 3          | 0.00  |        | 24   |
| Plant   | <i>Arabidopsis thaliana</i> | Intra | Self          | Leaf length at 35 days                | Morphology   |            | 0               | 2          | 0.00  |        | 24   |
| Plant   | <i>Arabidopsis thaliana</i> | Intra | Self          | No. of nodes                          | Morphology   |            | 0               | 1          | 0.00  |        | 24   |
| Plant   | <i>Arabidopsis thaliana</i> | Intra | Self          | Fruit no. in main inflor              | Life history |            | 1               | 3          | 0.33  |        | 22   |
| Plant   | <i>Arabidopsis thaliana</i> | Intra | Self          | Seed weight                           | Morphology   |            | 2               | 10         | 0.20  | 0.0879 | 22   |
| Plant   | <i>Arabidopsis thaliana</i> | Intra | Self          | Seed length                           | Morphology   |            | 2               | 8          | 0.25  | 0.2270 | 22   |
| Plant   | <i>Arabidopsis thaliana</i> | Intra | Self          | Fruit length                          | Morphology   |            | 3               | 6          | 0.50  | 1.0000 | 22   |
| Plant   | <i>Arabidopsis thaliana</i> | Intra | Self          | Ovary length                          | Morphology   |            | 2               | 4          | 0.50  |        | 22   |
| Plant   | <i>Arabidopsis thaliana</i> | Intra | Self          | Ovule no./fruit                       | Life history |            | 2               | 4          | 0.50  |        | 22   |
| Plant   | <i>Arabidopsis thaliana</i> | Intra | Self          | Seed no./fruit                        | Life history |            | 2               | 4          | 0.50  |        | 22   |
| Plant   | <i>Arabidopsis thaliana</i> | Intra | Self          | % of unfert. ovules                   | Life history |            | 2               | 6          | 0.33  | 0.5238 | 22   |
| Plant   | <i>Arabidopsis thaliana</i> | Intra | Self          | Fresh flower mass                     | Morphology   |            | 1               | 2          | 0.50  |        | 25   |
| Plant   | <i>Arabidopsis thaliana</i> | Intra | Self          | Petal length                          | Morphology   |            | 4               | 10         | 0.40  | 0.6060 | 25   |
| Plant   | <i>Arabidopsis thaliana</i> | Intra | Self          | Petal width                           | Morphology   |            | 0               | 2          | 0.00  |        | 25   |
| Plant   | <i>Arabidopsis thaliana</i> | Intra | Self          | Sepal length                          | Morphology   |            | 2               | 5          | 0.40  |        | 25   |
| Plant   | <i>Arabidopsis thaliana</i> | Intra | Self          | Sepal width                           | Morphology   |            | 1               | 3          | 0.33  |        | 25   |
| Plant   | <i>Arabidopsis thaliana</i> | Intra | Self          | Short stamen length                   | Morphology   |            | 3               | 7          | 0.43  | 1.0000 | 25   |
| Plant   | <i>Arabidopsis thaliana</i> | Intra | Self          | Long stamen length                    | Morphology   |            | 2               | 4          | 0.50  |        | 25   |
| Plant   | <i>Arabidopsis thaliana</i> | Intra | Self          | Pistil length                         | Morphology   |            | 0               | 5          | 0.00  |        | 25   |
| Plant   | <i>Arabidopsis thaliana</i> | Intra | Self          | PC1 (floral traits)                   | Morphology   |            | 2               | 5          | 0.40  |        | 25   |
| Plant   | <i>Arabidopsis thaliana</i> | Intra | Self          | PC2 (floral traits)                   | Morphology   |            | 1               | 2          | 0.50  |        | 25   |
| Plant   | <i>Arabidopsis thaliana</i> | Intra | Self          | Flowering time                        | Life history | T          | 3               | 7          | 0.43  | 1.0000 | 26   |
| Plant   | <i>Arabidopsis thaliana</i> | Intra | Self          | Total leaf number                     | Morphology   |            | 2               | 7          | 0.29  | 0.4531 | 26   |
| Plant   | <i>Arabidopsis thaliana</i> | Intra | Self          | Rosette leaf number                   | Morphology   |            | 3               | 7          | 0.43  | 1.0000 | 26   |
| Plant   | <i>Arabidopsis thaliana</i> | Intra | Self          | Cauline leaf number                   | Morphology   |            | 1               | 5          | 0.20  |        | 26   |
| Plant   | <i>Arabidopsis thaliana</i> | Intra | Self          | Flowering time                        | Life history | T          | 1               | 3          | 0.33  |        | 26   |
| Plant   | <i>Arabidopsis thaliana</i> | Intra | Self          | Total leaf number                     | Morphology   |            | 1               | 3          | 0.33  |        | 26   |

| Kingdom | Species                                           | Cross | Mating system | Trait                             | Trait type   | Timing (T) | No. antag. QTLs | Total QTLs | Ratio | P      | Ref. |
|---------|---------------------------------------------------|-------|---------------|-----------------------------------|--------------|------------|-----------------|------------|-------|--------|------|
| Plant   | <i>Arabidopsis thaliana</i>                       | Intra | Self          | Rosette leaf number               | Morphology   |            | 2               | 4          | 0.50  |        | 26   |
| Plant   | <i>Arabidopsis thaliana</i>                       | Intra | Self          | Cauline leaf number               | Morphology   |            | 1               | 4          | 0.25  |        | 26   |
| Plant   | <i>Arabidopsis thaliana</i>                       | Intra | Self          | Flowering time                    | Life history | T          | 1               | 2          | 0.50  |        | 26   |
| Plant   | <i>Arabidopsis thaliana</i>                       | Intra | Self          | Total leaf number                 | Morphology   |            | 1               | 2          | 0.50  |        | 26   |
| Plant   | <i>Arabidopsis thaliana</i>                       | Intra | Self          | Rosette leaf number               | Morphology   |            | 1               | 2          | 0.50  |        | 26   |
| Plant   | <i>Arabidopsis thaliana</i>                       | Intra | Self          | Cauline leaf number               | Morphology   |            | 1               | 2          | 0.50  |        | 26   |
| Plant   | <i>Arabidopsis thaliana</i>                       | Intra | Self          | Seed dormancy                     | Life history |            | 7               | 14         | 0.50  | 1.0000 | 27   |
| Plant   | <i>Arabidopsis thaliana</i>                       | Intra | Self          | Rosette leaf number               | Morphology   |            | 2               | 5          | 0.40  |        | 28   |
| Plant   | <i>Arabidopsis thaliana</i>                       | Intra | Self          | Seed storability                  | Physiology   |            | 1               | 4          | 0.25  |        | 29   |
| Plant   | <i>Arabidopsis thaliana</i>                       | Intra | Self          | Seed stachyose content            | Physiology   |            | 1               | 2          | 0.50  |        | 29   |
| Plant   | <i>Arabidopsis thaliana</i>                       | Intra | Self          | Seed raffinose content            | Physiology   |            | 0               | 1          | 0.00  |        | 29   |
| Plant   | <i>Arabidopsis thaliana</i>                       | Intra | Self          | Seed sucrose content              | Physiology   |            | 0               | 3          | 0.00  |        | 29   |
| Plant   | <i>Arabidopsis thaliana</i>                       | Intra | Self          | Phosphoglucomutase                | Physiology   |            | 0               | 1          | 0.00  |        | 30   |
| Plant   | <i>Arabidopsis thaliana</i>                       | Intra | Self          | Glucose-6-phosphate dehydrogenase | Physiology   |            | 0               | 1          | 0.00  |        | 30   |
| Plant   | <i>Arabidopsis thaliana</i>                       | Intra | Self          | Phosphoglucose isomerase          | Physiology   |            | 0               | 2          | 0.00  |        | 30   |
| Plant   | <i>Arabidopsis thaliana</i>                       | Intra | Self          | Glucose-6-phosphatase             | Physiology   |            | 1               | 3          | 0.33  |        | 30   |
| Plant   | <i>Arabidopsis thaliana</i>                       | Intra | Self          | Hexokinase                        | Physiology   |            | 0               | 1          | 0.00  |        | 30   |
| Plant   | <i>Arabidopsis thaliana</i>                       | Intra | Self          | Myrosinase                        | Physiology   |            | 0               | 2          | 0.00  |        | 30   |
| Plant   | <i>Arabidopsis thaliana</i>                       | Intra | Self          | Shikimic dehydrogenase            | Physiology   |            | 1               | 2          | 0.50  |        | 30   |
| Plant   | <i>Arabidopsis thaliana</i>                       | Intra | Self          | Period of circadian clock         | Physiology   | T          | 2               | 4          | 0.50  |        | 31   |
| Plant   | <i>Arabidopsis thaliana</i>                       | Intra | Self          | Rosette leaf number               | Morphology   |            | 2               | 5          | 0.40  |        | 28   |
| Plant   | <i>Arabidopsis thaliana</i>                       | Intra | Self          | Flowering date                    | Life history | T          | 2               | 5          | 0.40  |        | 28   |
| Plant   | <i>Arabidopsis thaliana</i>                       | Intra | Self          | Rosette leaf number               | Morphology   |            | 1               | 6          | 0.17  | 0.1667 | 32   |
| Plant   | <i>Arabidopsis thaliana</i>                       | Intra | Self          | Flowering date                    | Life history | T          | 3               | 7          | 0.43  | 1.0000 | 32   |
| Plant   | <i>Arabidopsis thaliana</i>                       | Intra | Self          | Four-leaf stage                   | Life history | T          | 0               | 1          | 0.00  |        | 33   |
| Plant   | <i>Arabidopsis thaliana</i>                       | Intra | Self          | Flowering time                    | Life history | T          | 1               | 3          | 0.33  |        | 33   |
| Plant   | <i>Arabidopsis thaliana</i>                       | Intra | Self          | Rosette leaf number               | Morphology   |            | 2               | 4          | 0.50  |        | 33   |
| Plant   | <i>Arabidopsis thaliana</i>                       | Intra | Self          | Dry biomass                       | Morphology   |            | 0               | 1          | 0.00  |        | 33   |
| Plant   | <i>Arabidopsis thaliana</i>                       | Intra | Self          | Longevity                         | Life history | T          | 0               | 1          | 0.00  |        | 33   |
| Plant   | <i>Arabidopsis thaliana</i>                       | Intra | Self          | Fruit number                      | Life history |            | 0               | 1          | 0.00  |        | 33   |
| Plant   | <i>Capsella bursa-pastoris</i>                    | Intra | Self          | Onset of flowering                | Life history | T          | 0               | 3          | 0.00  |        | 34   |
| Plant   | <i>Capsella bursa-pastoris</i>                    | Intra | Self          | Rosette leaf number               | Morphology   |            | 0               | 5          | 0.00  |        | 34   |
| Plant   | <i>Capsella bursa-pastoris</i>                    | Intra | Self          | Inflorescence height              | Morphology   |            | 0               | 3          | 0.00  |        | 34   |
| Plant   | <i>Capsella bursa-pastoris</i>                    | Intra | Self          | Maximal plant height              | Morphology   |            | 0               | 4          | 0.00  |        | 34   |
| Plant   | <i>Capsella bursa-pastoris</i>                    | Intra | Self          | Rosette diameter                  | Morphology   |            | 2               | 5          | 0.40  |        | 34   |
| Plant   | <i>Capsella bursa-pastoris</i>                    | Intra | Self          | Stem diameter (begin flower)      | Morphology   |            | 0               | 2          | 0.00  |        | 34   |
| Plant   | <i>Capsella bursa-pastoris</i>                    | Intra | Self          | No. of basal leaf branches        | Morphology   |            | 0               | 3          | 0.00  |        | 34   |
| Plant   | <i>Capsella bursa-pastoris</i>                    | Intra | Self          | No. of sterile fruits             | Life history |            | 1               | 4          | 0.25  |        | 34   |
| Plant   | <i>Capsella bursa-pastoris</i>                    | Intra | Self          | No. of fruits                     | Life history |            | 0               | 3          | 0.00  |        | 34   |
| Plant   | <i>Capsella bursa-pastoris</i>                    | Intra | Self          | Fruit length                      | Morphology   |            | 1               | 3          | 0.33  |        | 34   |
| Plant   | <i>Capsella bursa-pastoris</i>                    | Intra | Self          | Pedicel length                    | Morphology   |            | 1               | 3          | 0.33  |        | 34   |
| Plant   | <i>Capsella bursa-pastoris</i>                    | Intra | Self          | Seed number                       | Life history |            | 1               | 4          | 0.25  |        | 34   |
| Plant   | <i>Capsella bursa-pastoris</i>                    | Intra | Self          | Stem diameter (end flower)        | Morphology   |            | 1               | 4          | 0.25  |        | 34   |
| Plant   | <i>Microseris douglasii</i> x <i>M. bigelovii</i> | Inter | Self          | Trichome appearance               | Morphology   |            | 1               | 3          | 0.33  |        | 35   |
| Plant   | <i>Mimulus cardinalis</i> x <i>M. lewisii</i>     | Inter | Outcross      | Anthocyanin conc.                 | Physiology   |            | 0               | 1          | 0.00  |        | 36   |

| Kingdom | Species                                   | Cross | Mating system   | Trait                                  | Trait type   | Timing (T) | No. antag. QTLs | Total QTLs | Ratio | P      | Ref. |
|---------|-------------------------------------------|-------|-----------------|----------------------------------------|--------------|------------|-----------------|------------|-------|--------|------|
| Plant   | <i>Mimulus cardinalis x M. lewisii</i>    | Inter | Outcross        | Anthocyanin conc.                      | Physiology   |            | 0               | 3          | 0.00  |        | 36   |
| Plant   | <i>Mimulus cardinalis x M. lewisii</i>    | Inter | Outcross        | Lateral petal width                    | Morphology   |            | 2               | 8          | 0.25  | 0.2270 | 36   |
| Plant   | <i>Mimulus cardinalis x M. lewisii</i>    | Inter | Outcross        | Corolla width                          | Morphology   |            | 3               | 8          | 0.38  | 0.5706 | 36   |
| Plant   | <i>Mimulus cardinalis x M. lewisii</i>    | Inter | Outcross        | corolla projected area                 | Morphology   |            | 3               | 7          | 0.43  | 1.0000 | 36   |
| Plant   | <i>Mimulus cardinalis x M. lewisii</i>    | Inter | Outcross        | Upper petal reflexing                  | Morphology   |            | 0               | 5          | 0.00  |        | 36   |
| Plant   | <i>Mimulus cardinalis x M. lewisii</i>    | Inter | Outcross        | Lateral petal reflexing                | Morphology   |            | 0               | 4          | 0.00  |        | 36   |
| Plant   | <i>Mimulus cardinalis x M. lewisii</i>    | Inter | Outcross        | Nectar volume                          | Physiology   |            | 0               | 3          | 0.00  |        | 36   |
| Plant   | <i>Mimulus cardinalis x M. lewisii</i>    | Inter | Outcross        | Stamen length                          | Morphology   |            | 0               | 7          | 0.00  | 0.0156 | 36   |
| Plant   | <i>Mimulus cardinalis x M. lewisii</i>    | Inter | Outcross        | Pistil length                          | Morphology   |            | 0               | 7          | 0.00  | 0.0156 | 36   |
| Plant   | <i>Mimulus cardinalis x M. lewisii</i>    | Inter | Outcross        | Corolla aperture width                 | Morphology   |            | 2               | 8          | 0.25  | 0.2270 | 36   |
| Plant   | <i>Mimulus cardinalis x M. lewisii</i>    | Inter | Outcross        | Corolla aperture height                | Morphology   |            | 0               | 4          | 0.00  |        | 36   |
| Plant   | <i>Pinus silvestris</i>                   | Intra | Outcross        | Bud set, 1994                          | Life history | T          | 0               | 1          | 0.00  |        | 37   |
| Plant   | <i>Pinus silvestris</i>                   | Intra | Outcross        | Bud set, 1996                          | Life history | T          | 0               | 2          | 0.00  |        | 37   |
| Plant   | <i>Pinus silvestris</i>                   | Intra | Outcross        | Frost hardiness                        | Physiology   |            | 2               | 7          | 0.29  | 0.4531 | 37   |
| Plant   | <i>Populus trichocarpa x P. deltoides</i> | Inter | Outcross        | Bud set                                | Life history | T          | 2               | 4          | 0.50  |        | 38   |
| Plant   | <i>Populus trichocarpa x P. deltoides</i> | Inter | Outcross        | Bud flush                              | Life history | T          | 3               | 9          | 0.33  | 0.5078 | 38   |
| Plant   | <i>Populus trichocarpa x P. deltoides</i> | Inter | Outcross        | Spring bud flush                       | Life history | T          | 1               | 5          | 0.20  |        | 39   |
| Plant   | <i>Senecio vulgaris</i>                   | Intra | Outcross x self | Days to bud formation                  | Life history | T          | 0               | 1          | 0.00  |        | 40   |
| Plant   | <i>Senecio vulgaris</i>                   | Intra | Outcross x self | Plant height                           | Morphology   |            | 0               | 2          | 0.00  |        | 40   |
| Plant   | <i>Senecio vulgaris</i>                   | Intra | Outcross x self | Leaf number                            | Morphology   |            | 0               | 2          | 0.00  |        | 40   |
| Plant   | <i>Senecio vulgaris</i>                   | Intra | Outcross x self | Lateral branch number                  | Morphology   |            | 0               | 1          | 0.00  |        | 40   |
| Plant   | <i>Senecio vulgaris</i>                   | Intra | Outcross x self | Outer involucral bracts                | Morphology   |            | 0               | 1          | 0.00  |        | 40   |
| Plant   | <i>Senecio vulgaris</i>                   | Intra | Outcross x self | Disc florets/capitulum                 | Morphology   |            | 0               | 1          | 0.00  |        | 40   |
| Plant   | <i>Tetramolopium rockii x T. humilis</i>  | Inter | Outcross        | Sex expression in disc florets         | Life history |            | 0               | 2          | 0.00  |        | 41   |
| Plant   | <i>Zea diloperennis x Z. mays</i>         | Inter | Outcross        | No. of tassel branches                 | Morphology   |            | 2               | 7          | 0.29  | 0.4531 | 42   |
| Plant   | <i>Zea diloperennis x Z. mays</i>         | Inter | Outcross        | Length of central spike                | Morphology   |            | 0               | 2          | 0.00  |        | 42   |
| Plant   | <i>Zea diloperennis x Z. mays</i>         | Inter | Outcross        | Length of branching space              | Morphology   |            | 1               | 6          | 0.17  | 0.1667 | 42   |
| Plant   | <i>Zea diloperennis x Z. mays</i>         | Inter | Outcross        | Length of sessile spikelet             | Morphology   |            | 3               | 8          | 0.38  | 0.5706 | 42   |
| Plant   | <i>Zea diloperennis x Z. mays</i>         | Inter | Outcross        | Width of rachis on central spike       | Morphology   |            | 2               | 5          | 0.40  |        | 42   |
| Plant   | <i>Zea diloperennis x Z. mays</i>         | Inter | Outcross        | Mean internode length of central spike | Morphology   |            | 2               | 6          | 0.33  | 0.5238 | 42   |

Studies and/or traits are categorized in terms of kingdom, cross type, mating system, trait type, and whether or not the trait is related to the timing of developmental events. The number of antagonistic QTLs, the total number of QTLs detected, the proportion of QTLs with antagonistic or opposing effects are given for each trait. For traits with greater than six detected QTLs, the probability that the observed ratio results from neutral divergence is also provided.

1. Hawthorne, D. J. & Via, S. (2001) *Nature (London)* **412**, 904-907.
2. Knight, C. G., Azevedo, R. B. R. & Leroi, A. M. (2001) *Evolution* **55**, 1795-1804.
3. Shook, D. R. & Johnson, T. E. (1999) *Genetics* **153**, 1233-1243.
4. Wayne, M. L., Hackett, J. B., Dilda, C. L., Nuzhdin, S. V., Pasyukova, E. G. & Mackay, T. F. C. (2001) *Genet. Res.* **77**, 107-116.

5. Takahashi, A., Tsaour, S. C., Coyne, J. A. & Wu, C.-I. (2001) *Proc. Natl. Acad. Sci. USA* **98**, 3920-3925.
6. Nuzhdin, S. V. & Reiwitich, S. G. (2000) *Heredity* **84**, 97-102.
7. Nuzhdin, S. V., Pasyukova, E. G., Dilda, C. L., Zeng, Z. B. & Mackay, T. F. C. (1997) *Proc. Nat. Acad. Sci. USA* **94**, 9734-9739.
8. Gurganus, M. C., Fry J. D., Nuzhdin, S. V., Pasyukova, E. G., Lyman, R. F. & Mackay, T. F. C. (1998) *Genetics* **149**, 1883-1898.
9. Vieira, C. Pasyukova, E. G., Zeng, Z. B., Hackett, J. B., Lyman, R. F. & Mackay, T. F. C. (2000) *Genetics* **154**, 213-227.
10. Leips, J. & Mackay, T. F. C. (2000) *Genetics* **155**, 1773-1788.
11. Ashton, K., Wagoner, A. P., Carrillo, R. & Gibson, G. (2001) *Genetics* **157**, 283-294.
12. Jones, C. D. (1998) *Genetics* **149**, 1899-1908.
13. Sucena, E. & Stern, D. L. (2000) *Proc. Natl. Acad. Sci. USA* **97**, 4530-4534.
14. Zeng, Z. B., Jianjun, L., Stam, L. F., Kao, C. H., Mercer, J. M. & Laurie, C. C. (2000) *Genetics* **154**, 299-310.
15. True, J. R., Jianjun, L., Lynn, F. S., Zeng, Z. B., & Laurie, C. C. (1997) *Evolution* **51**, 816-832.
16. Macdonald, S. J. & Goldstein, D. B. (1999) *Genetics* **153**, 1683-1699.
17. Peichel, C. L., Nereng, K. S., Ohgi, K. A., Cole, B. L. E., Colosimo, P. F., Buerkle, C. A., Schluter, D. & Kingsley, D. M. (2001) *Nature (London)* **414**, 901-905.
18. Keightly, P. D., Hardge, T., May, L. & Bulfield, G. A. (1996) *Genetics* **142**, 227-235.
19. Brodtkin, E. S., Goforth, S. A., Keene, A. H., Fossella, J. A., & Silver, L. M. (2002) *J. Neurosci.* **22**, 1165-1170.
20. Robison, B. D., Wheeler, P. A., Sundin, K., Sikka, P. & Thorgaard, G. H. (2001) *J. Hered.* **92**, 1622.
21. Borevitz, J. O., Maloof, J. N., Lutes, J., Dabi, T., Redfern, J. L., Trainer, G. T., Werner, J. D., Asami, T., Berry, C. C., Weigel, D. & Chory, J. (2002) *Genetics* **160**, 683-696.
22. Alonso-Blanco, C., Blankestijn-De Vries, H., Hanhart, C.J. & Koornneef, M. (1999) *Proc. Natl. Acad. USA* **96**, 4710-4717.
23. Kuittinen, H., Sillanpaa, M. J. & Savolainen, O. (1997) *Theor. Appl. Genet.* **95**, 573-583.
24. Kowalski, S. P., Lan, T. H., Feldmann, K. A., & Paterson, A. H. (1994) *Mol. Gen. Genet.* **245**, 548-555.
25. Juenger, T., Purugganan, M. & Mackay, T. F. C. (2000) *Genetics* **156**, 1379-1392.
26. Alonso-Blanco, C., El-Assal, S. E., Coupland, G. & Koornneef, M. (1998) *Genetics* **149**, 749-764.
27. van der Schaar, W., Alonso-Blanco, C., Leon-Kloosterziel, K. M., Jansen, R. C., van Ooijen, J. H. & Koornneef, M. (1997) *Heredity* **79**, 190-200.
28. Clarke, J. H., Mithen, R., Brown, J. K. M. & Dean, C. (1995) *Mol. Gen. Genet.* **248**, 278-286.
29. Bentsink, L., Alonso-Blanco, C., Vreugdenhil, D., Tesnier, K., Groot, S. P. C. & Koornneef, M. (2000) *Plant Physiol.* **124**, 1595-1604.
30. Mitchell-Olds, T. & Pedersen, D. (1998) *Genetics* **149**, 739-747.
31. Swarup, K., Alonso-Blanco, C., Lynn, J. R., Michaels, S. D., Amasino, R. M., Koornneef, M. & Millar, A. J. (1999) *Plant* **20**, 67-77.
32. Stratton, D. A. (1998) *Heredity* **81**, 144-155.
33. Ungerer, M. C. (2000) Ph.D. dissertation (Indiana University, Bloomington).
34. Linde, M., Diel, S. & Neuffer, B. (2001) *Ann. Bot.* **87**, 91-99.
35. Hombergen, E. J. & Bachmann, K. (1995) *Theor. Appl. Genet.* **90**, 853-858.
36. Bradshaw, Jr., H. D., Otto, K. G., Frewen, B. E., McKay, J. K. & Schemske, D.W. (1998) *Genetics* **149**, 367-382.
37. Hurme, P., Sillanpaa, M. J., Arjas, E., Repo, T. & Savolainen, O. (2000) *Genetics* **156**, 1309-1322.
38. Frewen, B. E., Chen, T. H. H., Howe, G. T., Davis, J., Rohde, A., Boerjan, W. & Bradshaw, H. D., Jr. (2000) *Genetics* **154**, 837-845.
39. Bradshaw, H. D. , Jr. & Stettler, R. F. (1995) *Genetics* **139**, 963-973.
40. Moritz, D. M. L. & Kadereit, J. W. (2001) *Plant. Biol.* **3**, 544-552.
41. Whitkus, R., Doan, H. & Lowry, T. K. (2000) *Heredity* **85**, 37-42.
42. Westerbergh, A. & Doebley J. (2002) *Evolution* **56**, 273-283.
